1 **Bidirectional cooperation between Ubtfl and SL1 determines RNA Polymerase I promoter**  
2 **recognition *in cell* and is negatively affected in the UBTF-E210K neuroregression syndrome.**

3  
4 Michel G. Tremblay<sup>1</sup>, Dany S. Sibai<sup>1,2</sup>, Melissa Valère<sup>1,2</sup>, Jean-Clément Mars<sup>1,2,+</sup>, Frédéric Lessard<sup>1</sup>,  
5 Roderick T. Hori<sup>3</sup>, Mohammad M. Khan<sup>4</sup>, Victor Y. Stefanovsky<sup>1</sup>, Mark S. Ledoux<sup>5</sup> and Tom Moss<sup>1,2\*</sup>.

6  
7 <sup>1</sup>Laboratory of Growth and Development, St-Patrick Research Group in Basic Oncology, Cancer  
8 Division of the Quebec University Hospital Research Centre, Québec, Canada. <sup>2</sup>Department of  
9 Molecular Biology, Medical Biochemistry and Pathology, Faculty of Medicine, Laval University,  
10 Québec, Canada. <sup>3</sup>Departments of Microbiology, Immunology and Biochemistry and <sup>4</sup>Departments of  
11 Neurology and Anatomy & Neurobiology, University of Tennessee Health Science Center, Memphis,  
12 TN, USA. <sup>5</sup>Department of Psychology, University of Memphis, Memphis TN and Veracity  
13 Neuroscience LLC, Memphis, TN

14  
15 <sup>+</sup>Present address, IRIC, Université de Montréal, Montréal, Québec, Canada

16  
17 Correspondence should be addressed to;

18 Tom Moss, PhD,

19 Edifice St Patrick, 9 rue McMahon, Québec, QC, G1R 3S3, Canada.

20 E-mail. [Tom.Moss@crhdq.ulaval.ca](mailto:Tom.Moss@crhdq.ulaval.ca)

21 Tel. 1 418 691 5281

22 FAX 1 418 691 5439

23

24 Short title: Ubtfl-SL1 cooperation and the Ubtfl-E210K syndrome.

25 **KEYWORDS**

26 RNA Polymerase I (RPI, PolI, Polr1); RPI-specific TBP-TAF complex SL1/TIF-IB; Upstream Binding

27 Factor (Ubtf/Ubf); Ribosome Biogenesis; Ribosomal RNA (rRNA) gene; Ribosomal DNA (rDNA);

28 Active rDNA Chromatin; Taf1B-KO. UBTF-E210K neuroregression syndrome.

29

30

31 **ABSTRACT**

32 Transcription of the ~200 mouse and human ribosomal RNA genes (rDNA) by RNA Polymerase I  
33 (RPI/PolR1) accounts for 80% of total cellular RNA, around 35% of all nuclear RNA synthesis, and  
34 determines the cytoplasmic ribosome complement. It is therefore a major factor controlling cell growth  
35 and its malfunction has been implicated in hypertrophic and developmental disorders. Activation of  
36 each rDNA repeat requires nucleosome replacement by the architectural multi-HMGbox factor UBTF  
37 to create a 15kbp nucleosome free region (NFR). Formation of this NFR is also essential for  
38 recruitment of the TBP-TAF<sub>I</sub> factor SL1 and for preinitiation complex (PIC) formation at the gene and  
39 enhancer-associated promoters of the rDNA. However, these promoters show little sequence  
40 commonality and neither UBTF nor SL1 display significant DNA sequence binding specificity, making  
41 what drives PIC formation a mystery. Here we show that cooperation between SL1 and the longer  
42 UBTF1 splice variant generates the specificity required for rDNA promoter recognition *in cell*. We find  
43 that conditional deletion of the Taf1b subunit of SL1 causes a striking depletion UBTF at both rDNA  
44 promoters but not elsewhere across the rDNA. We also find that while both UBTF1 and -2 variants  
45 bind throughout the rDNA NFR, only UBTF1 is present with SL1 at the promoters. The data strongly  
46 suggest an induced-fit model of RPI promoter recognition in which UBTF1 plays an architectural role.  
47 Interestingly, a recurrent UBTF-E210K mutation and the cause of a pediatric neurodegeneration  
48 syndrome provides indirect support for this model. E210K knock-in cells show enhanced levels of the  
49 UBTF1 splice variant and a concomitant increase in active rDNA copies. In contrast, they also display  
50 reduced rDNA transcription and promoter recruitment of SL1. We suggest the underlying cause of the  
51 UBTF-E210K syndrome is therefore a reduction in cooperative UBTF1-SL1 promoter recruitment that  
52 may be partially compensated by enhanced rDNA activation.

## 53 INTRODUCTION

54 The ribosomal RNA (rRNA) genes encode the catalytic and structural RNAs of the ribosome as a  
55 single 47S precursor. As such, transcription of these genes is a major determinant of cell growth, cell  
56 cycle progression and cell survival and an essential factor in the formation of hypertrophic diseases  
57 such as cancer (1). Dysregulation of rRNA genes is also the cause of a large range of developmental  
58 and neurological disorders that are often also associated with cancer (2-6). To develop treatment  
59 strategies for these diseases it is important that we command an understanding of how these genes are  
60 transcribed and regulated. Transcription of the several hundred tandemly repeated and essentially  
61 identical rRNA genes, the rDNA, is undertaken exclusively by RNA Polymerase I (RPI, Pol1, PolR1)  
62 and a set of basal transcription factors dedicated to this task. This strict correspondence of gene and  
63 polymerase has resulted in the rapid coevolution of rDNA promoters with basal factors, leading to a  
64 high degree of species specificity of the RPI transcription machinery (7-9). The functional uniqueness  
65 of the RPI machinery provides an obvious target for novel therapeutic approaches (10). However, what  
66 directs the RPI transcription machinery exclusively to the rDNA and how it is specifically recruited to  
67 both the major 47S pre-rRNA promoter and enhancer element despite these having little or no DNA  
68 sequence commonality are still not understood. Here we show that despite having little or no inherent  
69 DNA sequence selectivity, the multi-HMGbox Upstream Binding Factor (UBF/UBTF) plays a crucial  
70 role in targeting RPI preinitiation complex formation to the rDNA promoters *in vivo*. Further, we show  
71 that this UBTF function is compromised by an E210K mutation recently linked to a recurrent human  
72 pediatric neuroregression syndrome (6, 11-13).

73

74 The basal factors of the mammalian RPI transcription machinery include Selectivity Factor 1 (SL1), the  
75 multi-HMGbox factor UBTF/UBF and the RPI-associated initiation factor RRN3 (8, 14, 15) (Figure  
76 1A). SL1 consists of the TATA-box Binding Protein (TBP) and the RPI specific TBP Associated  
77 Factors, TAFIA to D. Evolutionary variability of these TAFs determine their species-specific functions

78 and that of RPI transcription, and for example human or mouse SL1 complexes are not functionally  
79 exchangeable (16-18). In contrast, UBTF is a highly conserved essential factor that is functionally  
80 exchangeable between human, mouse and to some extent even *Xenopus* (18-20). Our present  
81 understanding of how SL1 and UBTF function in rDNA transcription derives predominantly from cell-  
82 free studies. These have suggested sequential binding scenarios for the formation of the RPI  
83 preinitiation complex, whereby one or two dimers of UBTF bind across the rDNA promoter to provide  
84 a landing site for SL1, though the converse has also been suggested (21, 22). UBTF was found to bend  
85 and loop DNA, suggesting that it could bring together the two distal Upstream Promoter Element  
86 (UPE, aka UCE) and Core Elements of the RPI promoter to form such a landing site for SL1 (23).  
87 However, UBTF of itself does not display any significant degree of sequence specific binding, making  
88 its role in targeting SL1 difficult to understand (9). Indeed, UBTF binds continuously throughout the  
89 transcribed regions of the active rDNA genes, where it creates a 20 kbp long Nucleosome-Free Region  
90 (NFR) bounded upstream by CTCF and the enhancer associated Spacer Promoter, flanked by the  
91 nucleosomal InterGenic Spacer (IGS) (24, 25) (Figure 1B). Despite this, targeted gene inactivation has  
92 unequivocally shown *Ubtf* to be essential for recruitment of SL1 to both the major 47S promoter and  
93 the enhancer associated Spacer Promoter in mouse (24, 26).

94

95 Here we extend recent studies of *Ubtf* and *Rrn3* (24, 26) to a conditional cell culture model for the  
96 *Taf1b* (TAF68) subunit of SL1, to the roles of the *Ubtf* variants and to a UBTF-E210K mutation  
97 recently identified as the cause of a recurrent pediatric neurodegeneration syndrome. The resulting data  
98 provide the first *in cell* test of the requirement for an RPI-specific TAF and a significant new insight  
99 into RPI preinitiation complex formation. The data resolve key questions surrounding rDNA promoter  
100 recognition and RPI pre-initiation complex formation by showing that the *Ubtf1* splice variant displays  
101 a striking specificity for the RPI promoter sequences only when in the presence of a functional SL1.  
102 They further suggest an “induced-fit” model of promoter recognition in which UBTF plays an

103 architectural role to model rDNA conformation to fit SL1 and hence catalyze its recruitment. Our  
104 findings further suggest that the fundamental cause of the UBTF-E210K pediatric neuroregression  
105 syndrome is a partial defect in SL1-Ubtf cooperation leading to reduced RPI preinitiation complex  
106 formation.

107

## 108 RESULTS

### 109 The Taf1B subunit of SL1 is essential for mouse development and rDNA transcription.

110 Mouse lines carrying a targeted “Knockout First” insertion in the gene for Taf1B (Taf68), were  
111 established and these crossed to generate lines carrying either conditional *taf1b<sup>flox</sup>* or *taf1b<sup>Δ</sup>* null-alleles  
112 (Figure S1). Mice heterozygous for a *taf1b<sup>Δ</sup>* allele were found to be both viable and fertile and the null-  
113 allele was propagated at near Mendelian frequency (Table S1). However, no *Taf1b<sup>Δ/Δ</sup>* homozygous  
114 offspring (pups) were identified and genotyping of embryos detected no *Taf1b<sup>Δ/Δ</sup>* homozygotes at  
115 stages 6.5 and later. It was therefore concluded that *Taf1b* was essential for mouse development beyond  
116 blastula, see Supplementary data for more detail.

117

118 To determine the cellular effects of Taf1B loss, *taf1b-flox* mice (Figure S1A and B) were also crossed  
119 to introduce *ER-Cre* and *p53-null* alleles and conditional (*taf1b<sup>flox/flox</sup>/ER-Cre<sup>+/+</sup>/p53<sup>-/-</sup>*) and isogenic  
120 control (*taf1b<sup>wt/wt</sup>/ER-Cre<sup>+/+</sup>/p53<sup>-/-</sup>*) mouse embryonic fibroblasts (MEFs) were isolated as previously  
121 described (24, 27). Addition of 50 nM 4-hydroxytamoxifen (4-HT) to the conditional MEFs induced  
122 homozygous recombination of *Taf1b<sup>flox</sup>* alleles. This treatment strongly depleted the Taf1B protein  
123 already 24 h post 4-HT and essentially eliminated it 96 h post 4-HT. As expected for an integral  
124 subunit of SL1, depletion of Taf1B was paralleled by the strong suppression of 47S pre-rRNA  
125 synthesis (Figure 1C and Figure S2).

126

127 **Taf1B deletion induces nucleolar stress.**

128 Deletion of the *Taf1b* gene also led to a disruption of nucleolar structure characteristic of nucleolar  
129 stress. Prior to *Taf1B* depletion, immunofluorescence imaging (IF) of conditional MEFs revealed the  
130 typical punctate sub-nucleolar pattern of RPI and Ubtf overlapped by fibrillarin (FBL) staining  
131 indicative of transcriptionally active rDNA gene units (0h post 4-HT, in Figures 1D and S3). During  
132 *Taf1B* depletion, RPI and Ubtf staining collapsed into common intense foci that were often arranged in  
133 pairs around more central FBL staining (e.g. 96 and 120h post 4-HT in Figures 1D and S3). At later  
134 times, Ubtf became highly condensed and partially segregated from RPI while FBL dispersed  
135 throughout the nucleus (120 h and 144 h post 4-HT in Figures 1D and S3). These changes were  
136 consistent with the nucleolar changes previously observed on inactivation of RPI transcription either by  
137 *Rrn3* gene deletion or CX-5461 drug inhibition (24, 28).

138

139 **Loss of *Taf1B* prevents SL1 recruitment but has only a small effect on “active” rDNA chromatin.**

140 Chromatin Immunoprecipitation (ChIP-qPCR) revealed that deletion of the *Taf1b* gene essentially  
141 eliminated *Taf1b* binding at the 47S and Spacer rDNA promoters in both MEFs and ESCs. It also  
142 prevented recruitment of the SL1 subunits TBP and *Taf1c* at both promoters (Figure 2B and S4). Thus,  
143 loss of *Taf1b* functionally inactivated SL1 and prevented preinitiation complex formation, explaining  
144 the suppression of rDNA transcription. In contrast, loss of *Taf1b* had only a limited effect on Ubtf  
145 binding across the 47S gene body where it predominantly replaces histone-based chromatin (24, 25)  
146 (see ETS and 28S amplicons in Figures 2B and S4). Consistent with this, psoralen accessibility  
147 crosslinking (PAC) indicated only a small reduction in the “active” form of rDNA chromatin that was  
148 previously shown to be dependent on Ubtf (24-26) (Figure 2C). Nevertheless, an increase in the  
149 mobility of the “active” PAC band on *Taf1B* loss suggested a higher degree of rDNA chromatin  
150 compaction, most probably related to the concomitant loss of RPI loading. A similar observation was  
151 made when *RRN3* was inactivated (24, 29).

152

153 **The recruitment of Ubtf and SL1 to the rDNA promoters is highly cooperative**

154 Though Taf1b depletion and the loss of SL1 recruitment to the rDNA had only a small effect on Ubtf  
155 binding across the gene body, inspection of the ChIP-qPCR mapping suggested that selective depletion  
156 did occur at both rDNA promoters (compare SpPr and T0/Pr with ETS and 28S amplicons in Figures  
157 2B and S4). This was confirmed using the higher resolution of Deconvolution ChIP-Seq mapping  
158 (DChIP-Seq) (9, 24). Before Taf1b depletion, DChIP-Seq revealed overlapping peaks of SL1 (Taf1b)  
159 and Ubtf at both rDNA promoters in conditional MEFs (Figure 3A). Subsequent Taf1b depletion  
160 essentially eliminated it from the promoters but also strongly suppressed the overlapping peak of Ubtf,  
161 and this same effect was also seen in Taf1b conditional mESCs (Figure S5A). Despite the Taf1b-  
162 dependent loss of Ubtf from the rDNA promoters, its binding profile elsewhere across the rDNA was  
163 unaffected, though a generalized 25 to 50% loss of Ubtf respectively in mESCs and MEFs was  
164 observed. The dependence of Ubtf binding on Taf1b, and hence on functional SL1, was most evident in  
165 DChIP-Seq difference maps, which showed strong suppression of Ubtf specifically at 47S and Spacer  
166 promoters in both MEFs and mESCs types (Figure 3A, B and S5A, B).

167  
168 The generation of DChIP-Seq profiles at differing degrees of Taf1b depletion allowed a quantitative  
169 estimate of the interdependence of Ubtf and SL1 binding at both rDNA promoters (see Materials and  
170 Methods and Figure S6). The data revealed near linear relationships between SL1 and Ubtf occupancy  
171 and confirmed that their binding was strongly interdependent at either promoter (Figure 3C). This was  
172 particularly striking given that these promoters share only 26% base sequence identity, no more than  
173 expected for two sequences chosen at random. Interestingly, the data (Figure 3C) also suggested a 2-  
174 fold difference in the relative SL1 : Ubtf stoichiometries between the Spacer and the 47S promoter,  
175 potentially a factor in their differential promoter strengths and functionalities.

176

177 **Only the longer of the two Ubtf variants is recruited to the rDNA promoters.**



178 The observation that Ubt1 recruitment depended on SL1 specifically at the rDNA promoters but not  
179 elsewhere across the rDNA repeat suggested that the Ubt1 variants might be important in this  
180 specificity. Mammals express two splice variants of Ubt1, both Ubt1 and Ubt2 encompass six tandem  
181 HMGbox DNA binding domain homologies but differ in HMGB-box2, a central segment of which is  
182 deleted in Ubt2 (Figure 4A). While MEFs express both forms of Ubt1, ESCs naturally express  
183 exclusively Ubt1 (Figure S5C). Promoter recruitment of Ubt1 in these cells was found to be strongly  
184 suppressed on depletion functional SL1 (Figure S5A and B). However, this left open the question of  
185 whether or not promoter recruitment of Ubt2 might also depended on SL1. To answer this question,  
186 we determined the distribution of each Ubt1 variant across the rDNA in MEFs.

187

188 Pools of NIH3T3 MEF clones expressing 3xFLAG-tagged Ubt1 or Ubt2 at sub-endogenous levels  
189 were selected and subjected to DChIP-Seq mapping (Figure 4B and S7A and B). The profiles of the  
190 3xFLAG-Ubt1 and -Ubt2 binding closely followed that of total endogenous Ubt1 across most of the  
191 rDNA, however, it was significantly different at the Spacer and 47S promoters. Characteristic peaks of  
192 Ubt1 were present at both promoters in the Ubt1 profile but were absent in the Ubt2 profile. This  
193 differential promoter binding was most evident in Ubt1-Ubt2 difference maps (Figure 4B and C, and  
194 S7B). Quantitative analysis of the variant Ubt1 occupancy profiles (Experimental Procedures and  
195 Figure S8) showed greater than 4 times more Ubt1 than Ubt2 at the rDNA promoters (Figure 4D).  
196 However, our previous studies of the Ubt1-DNA complex show that a Ubt1 dimer contacts contiguously  
197 130 to 140 bp of DNA, arguing that each 150-170bp rDNA promoter could interact with at most two  
198 dimers of Ubt1 (9, 23). Hence, the rDNA promoters must predominantly, if not exclusively, recruit  
199 Ubt1. Further, since Ubt1 was the sole variant present in ESCs and its promoter recruitment depended  
200 strongly on functional SL1 (Figure S5), it was concluded that promoter recognition and preinitiation  
201 complex formation *in vivo* specifically required the Ubt1 variant.

202

203 The combined data showed that formation of the RPI preinitiation complex *in cell* involves a  
204 cooperation between Ubtfl and SL1, and most surprisingly, this same cooperation occurred at both the  
205 Spacer and 47S promoters despite their unrelated base sequences. Since the only difference between  
206 Ubtfl and Ubt2 lies in the structure of HMGbox2, this domain must play a key role in Ubtfl-SL1  
207 cooperation and RPI promoter recognition.

208

209 **An HMGbox2 mutation linked to neuroregression potentially affects Ubtfl interactions.**

210 An E>K mutation at residue 210 in HMGbox2 of Ubtfl was recently shown to be the cause of a  
211 recurrent human pediatric neuroregression syndrome (6, 11-13). The key role of HMGbox2 revealed by  
212 our study suggested that this mutation might affect the formation of the RPI preinitiation complex *in*  
213 *vivo* and possibly explain the origin of this syndrome. Unfortunately, as yet the structure of HMGbox2  
214 has not been determined experimentally. However, despite a high degree of primary sequence  
215 variability, HMGboxes display very similar tertiary structures and DNA contacts, making them  
216 accessible to molecular modelling (summarized in Figure S9A). Modelling of Ubtfl-HMGbox2 revealed  
217 a typical HMGB saddle structure with basic residues K198, 200 and 211 lining the DNA binding  
218 underside (Figure S9B). Significantly, the sidechain of residue K211, a highly conserved minor groove  
219 contact in other HMGboxes, was predicted to be correctly oriented towards the DNA. In contrast, the  
220 sidechain of the immediately adjacent E210 residue was predicted to point away from the DNA and lay  
221 on the seat of the HMGbox saddle. Furthermore, this predicted sidechain position was unaffected by  
222 the E210K mutation (Figure S9C). We concluded that the E210K mutation was extremely unlikely to  
223 affect HMGbox2 interactions with the DNA. However, the mutation would create a significant change  
224 in the electrostatic surface potential of the seat of HMGbox2 (Figure S9D), suggesting that it could  
225 well affect interactions with other factors such as SL1.

226

227 **The UBTF HMGbox2 E210K mutation suppresses 47S rRNA synthesis in a MEF model.**

228 Given that the sequences of human and mouse UBTF are 99% identical, we took advantage of a  
229 recently generated *Ubt1*<sup>E210K</sup> mouse knock-in model. Mice homozygous for the E210K mutation are  
230 viable but exhibit behavioral abnormalities that worsen with increasing postnatal age (details will be  
231 described elsewhere). *Ubt1*<sup>E210K/E210K</sup> MEFs were isolated from these mice and found to proliferate  
232 somewhat more slowly than MEFs from isogenic wild type littermates, doubling times of 35h and 31h  
233 respectively (Figure 5A). Metabolic RNA labelling also revealed a >40% lower rate of *de novo* 47S  
234 pre-rRNA synthesis in the mutant as compared to the wild type MEFs (Figure 5B), however, no overt  
235 rRNA processing defects were detected (Figure S10A). The mutant MEFs also contained 30% less total  
236 cellular RNA, (~80% of which is of course rRNA), than wild type MEFs (Figure 5C). Thus, the E210K  
237 mutation in *Ubt1* significantly reduced the capacity of MEFs to synthesize rRNA and to assemble  
238 ribosomes, explaining their reduced proliferation rate.

239

#### 240 **The E210K mutation also enhances *Ubt1* levels and the fraction of active rDNA repeats**

241 Unexpectedly, the *Ubt1*<sup>E210K/E210K</sup> MEFs displayed a significant increase in the fraction of activated  
242 rDNA copies determined by PAC (Figure 5D and E), and this corresponded to an equally significant  
243 increase in the expression of the *Ubt1* variant both at the protein and mRNA levels (Figure 5F and G).  
244 A similar bias towards *Ubt1* expression was also observed in brain tissue of mutant mice (Figure 5H  
245 and I). This suggested the interesting possibility that the enhanced levels of *Ubt1* in the mutant MEFs  
246 revealed an inherent feedback mechanism regulating splicing. In this way the cell might control the  
247 fraction of active rDNA copies and hence potentially also rRNA synthesis. However, it will first be  
248 necessary to determine whether or not the E210K mutation directly affected usage of the adjacent  
249 splice junctions (see Figure S10B). In either scenario, the increase in active rDNA copies would  
250 normally be expected to enhance rRNA synthesis and cell growth in the mutant MEFs. Since this was  
251 clearly not the case, the E210K mutant MEFs displaying reduced rRNA synthesis, accumulation and  
252 proliferation (Figure 5A to C), we sought other origins for these effects.

253

254 **The E210K mutation reduces RPI loading and SL1 and Ubtf recruitment to the rDNA promoters**

255 ChIP-qPCR analyses revealed that RPI loading across the rDNA was reduce by >40% in the

256 *Ubtf*<sup>E210K/E210K</sup> mutant MEFs, explaining the observed reduction in pre-rRNA synthesis in these cells

257 (compare RPI loadings in Figure 6A with *de novo* rRNA synthesis levels in 5B). Recruitment of Taf1B

258 (SL1) and Ubtf to both Spacer and 47S rDNA promoters was somewhat reduced in the mutant MEFs,

259 though less than RPI loadings (Figure 6B). Thus, the E210K Ubtf mutation most probably reduced pre-

260 initiation complex formation, consistent with it affecting Ubtf-SL1 cooperation. The higher resolution

261 of DChIP-Seq further showed that occupancy of Ubtf at both 47S and Spacer promoters was selectively

262 reduced by the E210K mutation (Figure 6C), again consistent with a reduced Ubtf-SL1 cooperativity.

263 The reduction of Ubtf at the rDNA promoters was particularly apparent in difference maps between

264 wild type and E210K mutant MEFs (Figure 6D and S11). The reduction in Ubtf was especially strong

265 at the Spacer promoter and corresponded with a similar reduction in Taf1B occupancy and in RPI

266 recruitment ((Figure 6D and E). The data strongly suggested that the E210K mutation causes a small

267 but significantly reduced ability of Ubtf to cooperate with SL1 in the formation of the RPI preinitiation

268 complex, and together point to a reduction in the efficiency of RPI transcription initiation as the

269 fundamental cause of the UBTF-E210K neuroregression syndrome. Thus, these data indirectly support

270 the central role of the SL1-Ubfl cooperation in determining RPI preinitiation complex formation and

271 efficient rDNA transcription *in vivo*.

272

273

274 **DISCUSSION**

275 Formation of the RPI preinitiation complexes on the rRNA genes (rDNA) in mammals determines as

276 much as 35% of total nuclear RNA synthesis but is still poorly understood. In particular, prior to our

277 study it was unclear how, or indeed if, the multi-HMGbox factor UBTF played a role in targeting the

278 TBP-TAF<sub>I</sub> complex SL1 to the rDNA promoters or if it simply acted as a general chromatin  
279 replacement protein. Ubtf displays little or no DNA sequence binding specificity and binds throughout  
280 the 15kbp NFR of the mouse and human rDNA (25). We previously showed that conditional deletion  
281 of the Ubtf gene inactivated rDNA transcription and allowed the reformation of nucleosomes across the  
282 rDNA (24, 26). Hence, it appeared that Ubtf may simply facilitate SL1 recruitment by eliminating the  
283 obstacles presented by nucleosomes. Genetic ablation of the SL1 subunit Taf1B has now revealed an  
284 unexpected sequence specific role for Ubtf and has suggested a novel induced-fit model for RPI  
285 preinitiation complex formation.

286

287 Though it was assumed from cell-free studies that SL1 would be essential for cell and organism  
288 survival due to its role in rDNA transcription, this had not been directly tested. Our data show that  
289 homozygous deletion of the gene for the SL1 subunit Taf1b prevented mouse development beyond  
290 blastocyst while heterozygous deletants were viable and fertile. Hence, as observed for the other RPI  
291 basal factors Ubtf and Rrn3, Taf1b is an essential factor in mouse. Conditional deletion of *taf1b* in  
292 MEF and mES cell culture was also found to arrest rDNA transcription and to cause severe disruption  
293 of nucleolar structure characteristic of nucleolar stress (24, 28). Depletion of Taf1b also prevented  
294 promoter recruitment of Taf1c and TBP subunits of SL1 and hence PIC formation at both the 47S pre-  
295 rRNA and the Enhancer-associated Spacer rDNA promoters. Quite unexpectedly, this also led to a loss  
296 of Ubtf at both these promoters, though not elsewhere across the rDNA NFR. ChIP-qPCR and high  
297 resolution DChIP-Seq showed that the loss of Ubtf from the promoters was proportional to the loss of  
298 SL1, strongly arguing that binding of these two basal factors was cooperative. Conversely, we had  
299 previously shown that *in cell* loss of Ubtf eliminated SL1 from the rDNA promoters (24, 26), consistent  
300 with the cooperative recruitment of these factors. Data from early cell-free studies had suggested two  
301 possible scenarios for RPI preinitiation complex formation, either SL1 recruitment depended on pre-  
302 binding of Ubtf or conversely that Ubtf recruitment depended on pre-binding of SL1 (22, 30). Our data

303 resolve this contradiction by showing that in cells Ubt1 and SL1 binding at the rDNA promoters is  
304 strongly interdependent, neither factor being recruited in the absence of the other. The lack of Ubt1  
305 binding at the promoters in the absence of SL1 was particularly surprising, especially so since Ubt1  
306 remained bound throughout the rest of the rDNA NFR and even at immediately promoter adjacent  
307 sites. Thus, the absence of SL1 the RPI promoters rather than being prefer sites of Ubt1 binding as  
308 usually assumed, are quite on the contrary sites of low Ubt1 affinity lying within the NFR continuum of  
309 higher affinity sites.

310

311 Our data further revealed the key importance of the Ubt1 variant in the recruitment of SL1 to the  
312 rDNA promoters. Mouse and human cells express varying levels of the Ubt1 and Ubt2 splice variants  
313 that differ by a 37a.a deletion in HMGbox2 of Ubt2 (Figure 4). By mapping these variants across the  
314 rDNA we found that Ubt1 was recruited to the rDNA promoters at least four times more often than  
315 Ubt2, though the data were also consistent with the exclusive recruitment of UBTF1 at the promoters.  
316 In contrast, Ubt1 and Ubt2 bound indistinguishably elsewhere across the rDNA. Since only Ubt1 is  
317 present in mESCs, deletion of *taflb* in these cells also clearly demonstrated that promoter recruitment  
318 of Ubt1 depended on SL1 (Figures S4 and S5). Thus, formation of the RPI preinitiation complex is  
319 driven predominantly if not exclusively by a cooperation between SL1 and Ubt1. This provides the  
320 first mechanistic explanation for why Ubt1 is absolutely required for rDNA activity *in vivo* (31).

321

322 Recruitment of Ubt1 and SL1 was found to be cooperative not only at the major 47S rDNA promoter  
323 but also at the enhancer associated Spacer promoter. Since these promoters display little DNA  
324 sequence homology, this raised the question of what in fact defines an RPI promoter and how is it  
325 recognized? Our data clearly show that promoter recognition involves the cooperative recruitment of  
326 Ubt1 and SL1. Previous data showed that Ubt1 interacts with SL1 solely via its highly acidic C-  
327 terminal tail, an ~80 a.a. domain containing 65% Asp/Glu residues (32). However, this domain is not

328 essential for cell-free transcription (33) and is anyhow present in both Ubt1 variants. So, while it might  
329 play some role in bringing SL1 to the promoters it cannot explain their selective binding of Ubt1. Co-  
330 immunoprecipitation also failed to detect any specific interaction between SL1 and one or other of the  
331 Ubt1 variants (data not shown). Thus, it seems unlikely that the rDNA promoters are recognized by a  
332 pre-formed SL1-Ubt1 pre-initiation complex. Rather we suggest that promoter recognition involves  
333 the transient imposition of a specific DNA conformation by Ubt1 that is in turn locked into place by  
334 SL1 (Figure 7). There is significant precedent for such a mechanism, since the HMGboxes of Ubt1  
335 were shown to induce in-phase bending and looping of a DNA substrate. Indeed, it was suggested that  
336 such a looping could position UCE and Core promoter elements (Figure 1A) to facilitate their contact  
337 by SL1 (23, 34, 35). Essentially, Ubt1 might transiently mould the promoter DNA to create an  
338 induced-fit for SL1, which it could then lock in place. Since the 37 a.a. deletion in HMGbox2 of Ubt2  
339 prevents this box from bending DNA (35), Ubt2 would mould the promoter DNA differently from  
340 Ubt1 and would therefore not induce the appropriate fit for SL1.

341

342 Though in the induced-fit model of rDNA promoter recognition direct Ubt1-SL1 contacts would not  
343 be essential, they may nonetheless play an important part in stabilizing the preinitiation complex.  
344 Indeed, our study of the UBTF-E210K recurrent pediatric neuroregression syndrome suggested that  
345 this was quite probably the case. Molecular modelling showed that while this E210K mutation in  
346 HMGbox2 of UBTF was very unlikely to affect interactions with DNA, it might well affect interactions  
347 with other proteins such as SL1. We found that introduction of the homozygous Ubt1-E210K mutation  
348 in MEFs significantly reduced rDNA transcription rates, reduce total cellular RNA accumulation and  
349 slowed cell proliferation. In apparent contradiction to these effects, the E210K mutation enhanced  
350 expression of Ubt1 both in mutant MEFs and mouse tissues, and this led to an increase in the fraction  
351 of active rDNA copies, possibly as an attempt to compensate for reduced rDNA transcription.  
352 However, ChIP analyses further revealed that the Ubt1-E210K mutation reduced the cooperative

353 recruitment of SL1 and Ubt1 to the rDNA promoters. Thus, it appeared that the primary effect of the  
354 E210K-Ubt1 mutation was to limit PIC formation on the rDNA. This further emphasized the central  
355 importance of a functional cooperation between Ubt1 and SL1 in determining rDNA activity. It further  
356 suggested that the UBTF-E210K neurodegeneration syndrome was caused by a subtle defect in PIC  
357 formation on the rDNA.

358

359 In summary, our study identifies the parameters that determine RNA polymerase I promoter  
360 recognition and preinitiation complex formation *in vivo*. We reveal the central importance of a  
361 cooperative interaction between the RPI-specific TBP complex SL1 and the Ubt1 splice variant in  
362 promoter recognition and propose an induce-fit model for pre-initiation complex formation that  
363 explains the functional differences between the Ubt1 splice variants in terms of their abilities to induce  
364 specific conformational changes in the rDNA promoter sequences. Our data further suggest that the  
365 UBTF-E210K recurrent neurodegeneration syndrome is caused by a subtle reduction in UBTF-SL1  
366 cooperativity that leads to reduced rDNA transcription.

367

368



## 369 MATERIALS AND METHODS

### 370 Primary antibodies for Immunofluorescence, ChIP and Western blotting.

371 Rabbit polyclonal antibodies against mouse Ubtf, RPI large subunit (RPA194/Polr1A), and Taf1b were  
372 generated in the laboratory and have been previously described (24), anti-Taf1c was a gift from I.  
373 Grummt. All other antibodies were obtained commercially; anti-Fibrillarin (#LS-C155047, LSBio),  
374 anti-RPA135 (#SC-293272, Santa Cruz), anti-RPA194 (#SC-48385, Santa Cruz), anti-TBP (#ab818  
375 and #ab51841, Abcam) and anti-FLAG M2 (F3165, Sigma).

376

### 377 Generation of *taf1b* mutant mice.

378 *Taf1b*<sup>+/-</sup> (targeted allele Taf1btm1a(EUCOMM)Hmgu) embryonic stem (ES) cells were obtained from  
379 EuMMCR and generated using the targeting vector PG00150\_Z\_6\_E02. Two ES clones  
380 (HEPD0596\_3\_G02 and HEPD0596\_3\_H01) were each used to generate independent mouse lines  
381 using the services of the McGill Integrated Core for Animal Modeling (MICAM).

382

383 The resulting *taf1b*<sup>fl-neo</sup> mouse lines carried a “knock-out first” allele in which Lox recombination sites  
384 were inserted in intron 3 and intron 5, and a *neo* selective marker gene flanked by FRT sites inserted  
385 intron 3 (Figure S1A & B). Mouse lines heterozygous for the *taf1b*<sup>fl-neo</sup> allele derived from the two ES  
386 clones were viable, fertile, and appeared phenotypically normal compared to their wild-type littermate  
387 but no homozygotes were identified (data not shown). These mice were then crossed with FLPo (FLP  
388 recombinase) and Cre expressing mice (Jackson Laboratory strains FLPo (#012930), Sox2-Cre  
389 (#004783)) to generate both *taf1b*<sup>fl</sup> and *taf1b*<sup>Δ</sup> alleles (Figure S1A). Subsequently Cre and FLPo  
390 transgenes were removed by backcrossing. *Taf1b*<sup>fl/fl</sup>/*ER-cre*<sup>+/+</sup>, *taf1b*<sup>fl/fl</sup>/*ER-cre*<sup>+/+</sup>/*p53*<sup>-/-</sup> and  
391 corresponding *taf1b*<sup>+/+</sup> control mouse lines were generated by crossing with ER-Cre expressing and  
392 p53-null mice (Jackson Laboratory strains ER-Cre (#004847) and p53 KO (#002101) and used to  
393 generate MEF and mES cell lines as previously described (24). Mice were genotyped by PCR using the

394 primers (Figure S1A): A; 5'-gtcccttctcactgatcac, B; 5'-tgcagattaggtggcctcag, C; 5'-ccctctcaccttctaccca  
395 and D; 5'-ctgggcttggtggctgtaa.

396

### 397 **Embryo collection and genotyping**

398 Heterozygous *taf1b*<sup>Δ/wt</sup> mice were inter-crossed and embryos isolated, imaged and genotyped from  
399 pregnant females at E3.5, 6.5, 7.5, 8.5 and E9.5 as described in (24, 26). DNA from E3.5 embryos was  
400 amplified using the REPLI-g Mini kit (QIAGEN). Individual embryos were genotyped by PCR using  
401 the same primers as for mouse lines (Figure S1A).

402

### 403 **Ethics statement concerning animal research**

404 All animal care and animal experiments were conducted in accordance with the guidelines provided by  
405 the Canadian Council for Animal Protection, under the surveillance and authority of the institutional  
406 animal protection committees of Université Laval and the Centre hospitalier universitaire de Québec  
407 (CHU de Québec). The specific studies described were performed under protocol #2014-100 and 2014-  
408 101 examined and accepted by the “Comité de protection des animaux du CHU de Québec”. This  
409 ensured that all aspects of the work were carried out following strict guidelines to ensure careful,  
410 consistent and ethical handling of mice.

411

### 412 **Isolation and culturing of Taf1b conditional MEF and mES cells.**

413 Conditional Taf1b primary mouse embryonic fibroblasts (MEFs) were generated from E14.5  
414 *taf1b*<sup>fl/fl</sup>/*ER-Cre*<sup>+/+</sup>/*p53*<sup>-/-</sup> and wild type control *ER-Cre*<sup>+/+</sup>/*p53*<sup>-/-</sup> embryos as previously described (26,  
415 36), and were genotyped by PCR as described for mice, see Supplementary Data (Figure S1A and B).

416

417 Mouse Embryonic Stem (mES) cells were derived from the inner cell mass of *Taf1b*<sup>fl/fl</sup>/*ER-Cre*<sup>+/+</sup> and  
418 wild type control *ER-Cre*<sup>+/+</sup> blastocysts essentially as published (37). After establishment of the cells

419 on feeder monolayers, they were adapted to feeder-independence on 2i/LIF N2B27 (ThermoFisher)  
420 free serum medium (38) and subsequently maintained in this medium. The *tafl1b<sup>fl/fl</sup>/ER-Cre<sup>+/+</sup>* and  
421 control mESCs were genotyped as for MEFs.

422

423 Primary MEFs were also generated from E14.5 *ubtf<sup>E210K/E210K</sup>* and wild type control *ubtf<sup>wt/wt</sup>* sibling  
424 embryos from three independent litters, immortalized by transfection with pBSV0.3T/t (26) and  
425 genotyped by base sequencing of PCR products generated using primers 5'  
426 CTGGGTGAAGTAGGCCTTGG and 5' CCAGGAGGGTAAGGTGGAGA flanking the mutation  
427 site. All MEFs were cultured in Dulbecco's modified Eagle medium (DMEM)-high glucose (Life  
428 Technologies), supplemented with 10% fetal bovine serum (Wisent, Life Technologies or other), L-  
429 glutamine (Life Technologies) and Antibiotic/Antimycotic (Life Technologies).

430

#### 431 **Inactivation of *tafl1b* in cell culture.**

432 Gene inactivation in MEF cultures followed the previously described procedures (24, 26). Briefly, cells  
433 were plated in 6 cm petri dishes ( $0.8 \times 10^6$  cells each) and cultured for 18 hours in DMEM, high glucose,  
434 10% fetal bovine serum or 2i/LIF N2B27 free serum medium as appropriate. For *tafl1b* inactivation, 4-  
435 hydroxytamoxifen (4-HT) was added to both *tafl1b<sup>fl/fl</sup>* and control cell cultures to a final concentration  
436 of 50nM (the 0h time point for analyses). After 4 hr incubation the medium was replaced with fresh  
437 medium without 4-HT. Cell cultures were then maintained for the indicated times and systematically  
438 genotyped by PCR on harvesting.

439

#### 440 **Analysis of Taf1b and Ubtfl1/2 protein and mRNA levels.**

441 Taf1b, and Ubtfl1/2 protein levels were monitored by Western blotting. At harvesting, cells were  
442 quickly rinsed in cold phosphate buffered saline (PBS), recovered by centrifugation (2 min, 2000  
443 r.p.m.) and resuspended directly in SDS-polyacrylamide gel electrophoresis (SDS-PAGE) loading

444 buffer (39). After fractionation by SDS-PAGE, proteins were analysed by standard Western blotting  
445 procedures using an HRP conjugated secondary antibody and Immobilon chemiluminescence substrate  
446 (Millipore-Sigma). Membranes were imaged on an Amesham Imager 600 (Cytiva) and Ubtfl/2 ratios  
447 were determined from lane scans using ImageJ (40) and Gaussian curve fit using MagicPlot Pro  
448 (Magicplot Systems). Relative Ubtfl/2 mRNA levels were determined by PCR on total cDNA using  
449 primers bracketing the spliced sequences (5'TGCCAAGAAGTCGGACATCC and  
450 5'TCCGCACAGTACAGGGAGTA). Products were fractionated by electrophoresis on a 1.5 or 2%  
451 agarose EtBr-stained gel, photographed using the G:BOX acquisition system (Syngene) and Ubtfl/2  
452 mRNA ratios determined using ImageJ and Gaussian curve fitting as for proteins.

453

#### 454 **Determination of rRNA synthesis rate**

455 The rate of rRNA synthesis was determine by metabolic labelling immediately before cell harvesting.  
456 10  $\mu$ Ci [ $^3$ H]-uridine (PerkinElmer) was added per 1ml of medium and cell cultures incubated for a  
457 further 30min to 3h as indicated. RNA was recovered with 1 ml Trizol (Invitrogen) according to the  
458 manufacturer's protocol and resuspended in Formamide (Invitrogen). One microgram of RNA was  
459 loaded onto a 1% formaldehyde/MOPS Buffer gel (41, 42) or a 1% formaldehyde/TT Buffer gel (43).  
460 The EtBr-stained gels were photographed using the G:BOX acquisition system (Syngene), irradiated in  
461 a UV cross-linker (Hoefer) for 5 min at maximum energy, and transferred to a Biodyne B membrane  
462 (Pall). The membrane was UV cross-linked at 70 J/cm<sup>2</sup>, washed in water, air dried and exposed to a  
463 Phosphor BAS-IP TR 2025 E Tritium Screen (Cytiva). The screen was then analyzed using a Typhoon  
464 imager (Cytiva) and quantified using the ImageQuant TL image analysis software.

465

#### 466 **Psoralen crosslinking accessibility and Southern blotting.**

467 The psoralen crosslinking accessibility assay and Southern blotting were performed on cells grown in  
468 60 mm petri dishes and DNA was analyzed as previously described (44, 45), using the 6.7kb 47SrRNA

469 gene EcoRI fragment (pMr100) (44). The ratio of “active” to “inactive” genes was estimated by  
470 analyzing the intensity profile of low and high mobility bands revealed by phospho-imaging on an  
471 Amersham Typhoon (Cytiva) using a Gaussian peak fit generated with MagicPlotPro (MagicPlot  
472 Systems LLC).

473

#### 474 **Indirect immunofluorescence (IF) microscopy**

475 Cells were plated on poly-lysine treated coverslips and subjected to the standard 4-HT treatment to  
476 induce *taflb* deletion. At the indicated time points cells were rinsed with PBS, fixed in 4% PFA, PBS  
477 for 10 min and permeabilized with 0.5% Triton, PBS for 15 minutes. After a blocking step in PBS-N  
478 (PBS, 0.1% IGEPAL (Sigma)), 5% donkey serum, cover slips were incubated with primary antibodies  
479 in PBS-N, 5% donkey serum for ~16 h at 4 deg. C. RPI was detected using a combination of mouse  
480 anti-A194 and A135 antibodies (#SC-293272, #SC-48385), fibrillarlin with goat anti-FBL (#LS-  
481 C155047), and Ubtf with rabbit anti-Ubtf (in-house #8). Cells were incubated for ~ 2 h at room  
482 temperature with the appropriate AlexaFluor or Dylight 488/568/647 conjugated secondary antibodies  
483 (ThermoFisher / Jackson ImmunoResearch) and counterstained with DAPI. After mounting in Prolong  
484 Diamond (ThermoFisher), epifluorescent 3D image stacks were acquired using a Leica SP5 II scanning  
485 confocal microscope and LAS-AF (Leica Microsystems) and Volocity (Quorum Technologies)  
486 software.

487

#### 488 **Chromatin immunoprecipitation (ChIP)**

489 Cells were fixed with 1% formaldehyde for 8 min at room temperature. Formaldehyde was quenched  
490 by addition of 125 mM Glycine and cells harvested and washed in PBS. Nuclei were isolated using an  
491 ultrasound-based nuclei extraction method (NEXSON: Nuclei Extraction by SONication) (46) with  
492 some modifications. Briefly, for all cell types, 33 million cells were resuspended in 1.5 ml of Farnham  
493 lab buffer (5 mM PIPES pH 8.0, 85 mM KCl, 0.5% IGEPAL, protease inhibitors). Cell suspensions

494 were sonicated in 15 ml polystyrene tubes (BD #352095) using 3 to 4 cycles of 15 sec on : 30 sec off at  
495 low intensity in a Bioruptor (Diagenode). After recovery of the NEXSON-isolated nuclei by  
496 centrifugation (1000g, 5 min), nuclei were resuspended in 1.5 ml of shearing buffer (10 mM Tris-HCl  
497 pH 8.0, 1 mM NaEDTA, 0.1% SDS, protease inhibitors) and sonicated for 25 min, 30 sec on : 30 sec  
498 off , at high intensity. Each immunoprecipitation (IP) was carried out using the equivalent of  $16 \times 10^6$   
499 cells as previously describe (24). To map Ubtfl and Ubt2 variants cDNAs encompassing the complete  
500 coding regions (M61726 / M61725) were subcloned into pCDNA3-3xFLAG-C1 (N. Bisson) and  
501 verified by Sanger sequencing. The resulting pC3xFLAG-UBF1 and -UBF2 (lab. stocks #2072, #2073)  
502 constructs were used to transfect NIH3T3 and cell cultures selected with G418. Pools of positive clones  
503 expressing Ubtfl or Ubt2 at sub-endogenous levels were then subjected to parallel ChIP for FLAG-  
504 Ubtfl/2 (anti-FLAG) and total Ubtf.

505

#### 506 **ChIP-qPCR analysis.**

507 All ChIP experiments included a minimum of 2 biological replicates and were analyzed as previously  
508 described (24). For qPCR analysis, reactions (20  $\mu$ l) were performed in triplicate using 2.5  $\mu$ l of sample  
509 DNA, 20 pmol of each primer, and 10  $\mu$ l of Quantifast SYBR Green PCR Master Mix (QIAGEN) or  
510 PowerUp™ SYBR™ Green Master Mix (ThermoFisher). Forty reaction cycles of 10 s at 95 °C and 30 s  
511 at 58 °C were carried out on a Multiplex 3005 Plus (Stratagene/Agilent). The amplicon coordinates  
512 relative to the 47S rRNA initiation site (BK000964v3) were as follows: IGS3, 42653-42909; SpPr,  
513 43076- 43279; Tsp, 43253-43447; T0/Pr (47SPr), 45133-40; 47S-5', 159-320; ETS, 3078-3221; 28S,  
514 10215-10411; T1-3, 13417-13607. Data was analyzed using the MxPro software (Agilent). The relative  
515 occupancy of each factor was determined by comparison with a standard curve of amplification  
516 efficiency for each amplicon using a range of input DNA amounts generated in parallel with each  
517 qPCR run.

518

519 **ChIP-Seq and data analysis.**

520 ChIP DNA samples were quality controlled by qPCR before being sent for library preparation and 50  
521 base single-end sequencing on an Illumina HiSeq 2500 or 4000 (McGill University and Genome  
522 Quebec Innovation Centre). Sequence alignment and deconvolution of factor binding profiles to  
523 remove sequencing biases (Deconvolution ChIP-Seq, DChIP-Seq) were carried out as previously  
524 described (9, 24). The manual for the deconvolution protocol and a corresponding Python script can be  
525 found at <https://github.com/mariFelix/deconvoNorm>. Gaussian curve fitting to transcription factor  
526 binding profiles was performed using MagicPlot Pro (Magicplot Systems) on data from the DChIP-Seq  
527 BedGraph files. The raw sequence files and the processed deconvolution BedGraphs have been  
528 submitted to ArrayExpress under accession E-MTAB-10433.

529

530 **Cell Proliferation Assay.**

531 Cells from two *ubf*<sup>wt/wt</sup> MEF clones (#3, #4) and three *ubf*<sup>E210K/E210K</sup> MEF clones (#1, #2, #3) were  
532 continuously cultured for more than a week prior to assay. Cells were plated at ~500 per well in  
533 96-well plates and cultured for six days. At each timepoint, duplicate wells were treated with  
534 Hoechst 3342 (Invitrogen, Thermo Fisher Scientific) for 45min. Images were acquired using  
535 Cytation5 (Cell Imaging Multi-Mode Reader by BioTek) and cell counts for each clone were  
536 determined using the Gen5 software.

537

538 **Total RNA Extraction and Quantification**

539 Cells were trypsinized, counted and total RNA was recovered from  $3 \times 10^6$  cells using 1 ml of Trizol  
540 (Invitrogen, Thermo Fisher Scientific) according to the manufacturer's protocol. RNA yields were  
541 determined using Qubit RNA BR (Invitrogen, Thermo Fisher Scientific).

542

543 **FUNDING**

544 This work was supported by operating grants from the Canadian Institutes of Health Research (CIHR),  
545 [grant number MOP12205/PJT153266] and the Natural Science and Engineering Council (NSERC) of  
546 Canada [grant number RGPIN-2017-06128] to T. Moss, and the National Institutes of Health of the  
547 U.S.A. (NIH) [grant numbers R21 GM118962 and R03 NS114616] respectively to R. T. Hori and M.  
548 M. Khan. The Research Centre of the Québec University Hospital Centre (CRCHU de Québec-  
549 Université Laval) is supported by the Fonds de Recherche du Québec - Santé (FRQS).

550

551 **ACKNOWLEDGEMENTS**

552 We would like to thank the staff of the “Centre d’Expertise et de Services Génome Québec” for Next-  
553 Generation Sequencing, Marianne Sabourin-Felix (Cancer Division, CRCHU de Québec-Université  
554 Laval) for sequence alignment and DChIP-Seq deconvolution and Mark Robinson and Helen Lindsay  
555 (IMLS/SIB, University of Zürich) for making their computing facilities and advice available to us.

556

557 **REFERENCES**

- 558 1. Hannan KM, Sanij E, Rothblum LI, Hannan RD, Pearson RB. Dysregulation of RNA polymerase  
559 I transcription during disease. *Biochim Biophys Acta*. 2013;1829(3-4):342-60.
- 560 2. Long PA, Theis JL, Shih YH, Maleszewski JJ, Abell Aleff PC, Evans JM, et al. Recessive  
561 TAF1A mutations reveal ribosomopathy in siblings with end-stage pediatric dilated  
562 cardiomyopathy. *Hum Mol Genet*. 2017;26(15):2874-81.
- 563 3. Dauwerse JG, Dixon J, Seland S, Ruivenkamp CA, van Haeringen A, Hoefsloot LH, et al.  
564 Mutations in genes encoding subunits of RNA polymerases I and III cause Treacher Collins  
565 syndrome. *Nat Genet*. 2011;43(1):20-2.
- 566 4. Phan T, Khalid F, Iben S. Nucleolar and Ribosomal Dysfunction-A Common Pathomechanism in  
567 Childhood Progerias? *Cells*. 2019;8(6).



- 568 5. Kara B, Koroglu C, Peltonen K, Steinberg RC, Maras Genc H, Holtta-Vuori M, et al. Severe  
569 neurodegenerative disease in brothers with homozygous mutation in POLR1A. *European journal*  
570 *of human genetics* : EJHG. 2017;25(3):315-23.
- 571 6. Toro C, Hori RT, Malicdan MCV, Tiffit CJ, Goldstein A, Gahl WA, et al. A recurrent de novo  
572 missense mutation in UBTF causes developmental neuroregression. *Hum Mol Genet.*  
573 2018;27(4):691-705.
- 574 7. Moss T, Mitchelson K, de Winter R. The promotion of ribosomal transcription in eukaryotes.  
575 *Oxf Surv Eukaryot Genes.* 1985;2:207-50.
- 576 8. Moss T, Langlois F, Gagnon-Kugler T, Stefanovsky V. A housekeeper with power of attorney:  
577 the rRNA genes in ribosome biogenesis. *Cell Mol Life Sci.* 2007;64(1):29-49.
- 578 9. Mars JC, Sabourin-Felix M, Tremblay MG, Moss T. A Deconvolution Protocol for ChIP-Seq  
579 Reveals Analogous Enhancer Structures on the Mouse and Human Ribosomal RNA Genes. *G3*  
580 *(Bethesda).* 2018;8(1):303-14.
- 581 10. Ferreira R, Schneekloth JS, Jr., Panov KI, Hannan KM, Hannan RD. Targeting the RNA  
582 Polymerase I Transcription for Cancer Therapy Comes of Age. *Cells.* 2020;9(2).
- 583 11. Edvardson S, Nicolae CM, Agrawal PB, Mignot C, Payne K, Prasad AN, et al. Heterozygous De  
584 Novo UBTF Gain-of-Function Variant Is Associated with Neurodegeneration in Childhood. *Am*  
585 *J Hum Genet.* 2017;101(2):267-73.
- 586 12. Sedlackova L, Lassuthova P, Sterbova K, Haberlova J, Vyhnanekova E, Neupauerova J, et al.  
587 UBTF Mutation Causes Complex Phenotype of Neurodegeneration and Severe Epilepsy in  
588 Childhood. *Neuropediatrics.* 2019;50(1):57-60.
- 589 13. Bastos F, Quinodoz M, Addor MC, Royer-Bertrand B, Fodstad H, Rivolta C, et al. Childhood  
590 neurodegeneration associated with a specific UBTF variant: a new case report and review of the  
591 literature. *BMC Neurol.* 2020;20(1):17.

- 592 14. Grummt I. Life on a planet of its own: regulation of RNA polymerase I transcription in the  
593 nucleolus. *Genes Dev.* 2003;17(14):1691-702.
- 594 15. Russell J, Zomerdijk JC. RNA-polymerase-I-directed rDNA transcription, life and works. *Trends*  
595 *Biochem Sci.* 2005;30(2):87-96.
- 596 16. Rudloff U, Eberhard D, Tora L, Stunnenberg H, Grummt I. TBP-associated factors interact with  
597 DNA and govern species specificity of RNA polymerase I transcription. *EMBO J.* 1994;13:2611-  
598 6.
- 599 17. Heix J, Zomerdijk JCBM, Ravanpay A, Tjian R, Grummt I. Cloning of murine RNA polymerase  
600 I-specific TAF factors: Conserved interactions between the subunits of the species-specific  
601 transcription initiation factor TIF-IB/SL1. *ProcNatlAcadSciUSA.* 1997;94:1733-8.
- 602 18. Murano K, Okuwaki M, Momose F, Kumakura M, Ueshima S, Newbold RF, et al. Reconstitution  
603 of human rRNA gene transcription in mouse cells by a complete SL1 complex. *J Cell Sci.*  
604 2014;127(Pt 15):3309-19.
- 605 19. Bell SP, Pikaard CS, Reeder RH, Tjian R. Molecular mechanisms governing species-specific  
606 transcription of ribosomal RNA. *Cell.* 1989;59:489-97.
- 607 20. Cairns C, McStay B. HMG box 4 is the principal determinant of species specificity in the RNA  
608 polymerase I transcription factor UBF. *Nucleic Acids Res.* 1995;23:4583-90.
- 609 21. Bell SP, Jantzen H-M, Tjian R. Assembly of alternative multiprotein complexes directs rRNA  
610 promoter selectivity. *Genes Dev.* 1990;4:943-54.
- 611 22. Friedrich JK, Panov KI, Cabart P, Russell J, Zomerdijk JC. TBP-TAF complex SL1 directs RNA  
612 polymerase I pre-initiation complex formation and stabilizes upstream binding factor at the  
613 rDNA promoter. *J Biol Chem.* 2005;280(33):29551-8.
- 614 23. Stefanovsky VY, Bazett-Jones DP, Pelletier G, Moss T. The DNA supercoiling architecture  
615 induced by the transcription factor xUBF requires three of its five HMG-boxes. *Nucleic Acids*  
616 *Res.* 1996;24:3208-15.

- 617 24. Herdman C, Mars JC, Stefanovsky VY, Tremblay MG, Sabourin-Felix M, Lindsay H, et al. A  
618 Unique Enhancer Boundary Complex on the Mouse Ribosomal RNA Genes persists after loss of  
619 Rrn3 or UBF and the Inactivation of RNA Polymerase I Transcription. *PLoS Genetics*.  
620 2017;13(7):e1006899.
- 621 25. Moss T, Mars JC, Tremblay MG, Sabourin-Felix M. The chromatin landscape of the ribosomal  
622 RNA genes in mouse and human. *Chromosome Res*. 2019;27(1-2):31-40.
- 623 26. Hamdane N, Stefanovsky VY, Tremblay MG, Nemeth A, Paquet E, Lessard F, et al. Conditional  
624 inactivation of Upstream Binding Factor reveals its epigenetic functions and the existence of a  
625 somatic nucleolar precursor body. *PLoS Genetics*. 2014;10(8):e1004505.
- 626 27. Bryja V, Bonilla S, Arenas E. Derivation of mouse embryonic stem cells. *Nat Protoc*.  
627 2006;1(4):2082-7.
- 628 28. Mars JC, Tremblay MG, Valere M, Sibai DS, Sabourin-Felix M, Lessard F, et al. The  
629 chemotherapeutic agent CX-5461 irreversibly blocks RNA polymerase I initiation and promoter  
630 release to cause nucleolar disruption, DNA damage and cell inviability. *NAR Cancer*.  
631 2020;2(4):zcaa032.
- 632 29. Wittner M, Hamperl S, Stockl U, Seufert W, Tschochner H, Milkereit P, et al. Establishment and  
633 maintenance of alternative chromatin states at a multicopy gene locus. *Cell*. 2011;145(4):543-54.
- 634 30. Bell SP, Learned RM, Jantzen HM, Tjian R. Functional cooperativity between transcription  
635 factors UBF1 and SL1 mediates human ribosomal RNA synthesis. *Science*. 1988;241:1192-7.
- 636 31. Sanij E, Poortinga G, Sharkey K, Hung S, Holloway TP, Quin J, et al. UBF levels determine the  
637 number of active ribosomal RNA genes in mammals. *J Cell Biol*. 2008;183(7):1259-74.
- 638 32. Tuan JC, Zhai WG, Comai L. Recruitment of TATA-binding protein-TAF, complex SL1 to the  
639 human ribosomal DNA promoter is mediated by the carboxy-terminal activation domain of  
640 upstream binding factor (UBF) and is regulated by UBF phosphorylation. *MolCell Biol*.  
641 1999;19:2872-9.

- 642 33. Jantzen HM, Chow AM, King DS, Tjian R. Multiple domains of the RNA polymerase I activator  
643 hUBF interact with the TATA-binding protein complex hSL1 to mediate transcription. *Genes*  
644 *Dev.* 1992;6:1950-63.
- 645 34. Stefanovsky VY, Pelletier G, Bazett-Jones DP, Crane-Robinson C, Moss T. DNA looping in the  
646 RNA polymerase I enhancosome is the result of non-cooperative in-phase bending by two UBF  
647 molecules. *Nucleic Acids Res.* 2001;29(15):3241-7.
- 648 35. Stefanovsky VY, Moss T. The splice variants of UBF differentially regulate RNA polymerase I  
649 transcription elongation in response to ERK phosphorylation. *Nucleic Acids Res.*  
650 2008;36(15):5093-101.
- 651 36. Giroux S, Tremblay M, Bernard D, Cadrin-Girard JF, Aubry S, Larouche L, et al. Embryonic  
652 death of Mek1-deficient mice reveals a role for this kinase in angiogenesis in the labyrinthine  
653 region of the placenta. *Curr Biol.* 1999;9:369-72.
- 654 37. Conner DA. Mouse embryonic stem (ES) cell isolation. *Curr Protoc Mol Biol.* 2001;Chapter  
655 23:Unit 23.4.
- 656 38. Ying QL, Wray J, Nichols J, Batlle-Morera L, Doble B, Woodgett J, et al. The ground state of  
657 embryonic stem cell self-renewal. *Nature.* 2008;453(7194):519-23.
- 658 39. Laemmli UK. Cleavage of structural proteins during the assembly of the head of bacteriophage  
659 T4. *Nature.* 1970;227:680-5.
- 660 40. Schneider CA, Rasband WS, Eliceiri KW. NIH Image to ImageJ: 25 years of image analysis. *Nat*  
661 *Methods.* 2012;9(7):671-5.
- 662 41. Stefanovsky VY, Moss T. Metabolic Labeling in the Study of Mammalian Ribosomal RNA  
663 Synthesis. *Methods Mol Biol.* 2016;1455:133-45.
- 664 42. Stefanovsky VY, Pelletier G, Hannan R, Gagnon-Kugler T, Rothblum LI, Moss T. An immediate  
665 response of ribosomal transcription to growth factor stimulation in mammals is mediated by ERK  
666 phosphorylation of UBF. *Mol Cell.* 2001;8(5):1063-73.

- 667 43. Mansour FH, Pestov DG. Separation of long RNA by agarose-formaldehyde gel electrophoresis.  
668 Anal Biochem. 2013;441(1):18-20.
- 669 44. Conconi A, Widmer RM, Koller T, Sogo JM. Two different chromatin structures coexist in  
670 ribosomal RNA genes throughout the cell cycle. Cell. 1989;57:753-61.
- 671 45. Stefanovsky VY, Moss T. Regulation of rRNA synthesis in human and mouse cells is not  
672 determined by changes in active gene count. Cell Cycle. 2006;5(7):735-9.
- 673 46. Arrigoni L, Richter AS, Betancourt E, Bruder K, Diehl S, Manke T, et al. Standardizing  
674 chromatin research: a simple and universal method for ChIP-seq. Nucleic Acids Res.  
675 2016;44(7):e67.
- 676 47. Martianov I, Viville S, Davidson I. RNA polymerase II transcription in murine cells lacking the  
677 TATA binding protein. Science. 2002;298(5595):1036-9.
- 678 48. Comai L, Tanese N, Tjian R. The TATA-binding protein and associated factors are integral  
679 components of the RNA polymerase I transcription factor, SL1. Cell. 1992;68:965-76.
- 680 49. Liko D, Mitchell L, Campbell KJ, Ridgway RA, Jones C, Dudek K, et al. Brf1 loss and not  
681 overexpression disrupts tissues homeostasis in the intestine, liver and pancreas. Cell Death  
682 Differ. 2019;26(12):2535-50.
- 683 50. Waterhouse A, Bertoni M, Bienert S, Studer G, Tauriello G, Gumienny R, et al. SWISS-  
684 MODEL: homology modelling of protein structures and complexes. Nucleic Acids Res.  
685 2018;46(W1):W296-w303.
- 686 51. Goddard TD, Huang CC, Meng EC, Pettersen EF, Couch GS, Morris JH, et al. UCSF ChimeraX:  
687 Meeting modern challenges in visualization and analysis. Protein Sci. 2018;27(1):14-25.
- 688 52. Gao K, Masuda A, Matsuura T, Ohno K. Human branch point consensus sequence is yUnAy.  
689 Nucleic Acids Res. 2008;36(7):2257-67.

690

691

692 **FIGURE LEGENDS**

693 **Figure 1.** Genetic inactivation of the *taflb* gene disrupts rRNA synthesis and nucleolar structure in  
694 conditional MEFs. A) Schematic of the basal factors of the RNA Polymerase I (RPI/Pol1) initiation  
695 complex and their assembly on the rDNA promoter. The diagram is not intended to indicate precise  
696 factor positioning. B) General organisation of the rDNA chromatin structure in mouse. The positions of  
697 Spacer and 47S Promoter duplications, the distribution of Ubtf, CTCF binding at the upstream  
698 boundary and the flanking nucleosomal IGS are indicated. C) Synthesis of 47S pre-rRNA in *taflb*  
699 conditional MEFs. 47S pre-rRNA synthesis was determined by [<sup>3</sup>H]-uridine RNA metabolic labelling  
700 following homozygous *taflb* deletion by 4-HT induction of ER-Cre. The upper inset panel shows a  
701 typical example of 47S pre-rRNA labelling in *taflb<sup>fl/fl</sup>/p53<sup>-/-</sup>/ERcre<sup>+/+</sup>* MEFs at different times after ER-  
702 Cre induction. The lower histogram shows 47S labelling in *taflb<sup>fl/fl</sup>/p53<sup>-/-</sup>/ERcre<sup>+/+</sup>* MEFs normalized  
703 to labelling in control *taflb<sup>wt/wt</sup>/p53<sup>-/-</sup>/ERcre<sup>+/+</sup>* MEFs. The data shown in the histogram were derived  
704 from 6 independent analyses of MEFs derived from two floxed and two wild type embryos. Error bars  
705 indicate the SEM. See Figure S2 for the time course of *taflb* deletion and Taf1b protein depletion. D)  
706 RPI, Ubtf and fibrillar (FBL) indirect immunofluorescence labelling in *taflb<sup>fl/fl</sup>/p53<sup>-/-</sup>/ERcre<sup>+/+</sup>* MEFs  
707 after 4-HT induction of *taflb* deletion, see Figure S3 for a more detail.

708

709 **Figure 2.** Loss of Taf1b abrogates RPI but not Ubtf recruitment to the rDNA. A) Organisation of the  
710 mouse rDNA locus indicating the positions of the Spacer (SpPr) and 47S (47SPr) promoter sequences,  
711 the RPI termination sites Tsp, T<sub>0</sub> and T<sub>1-10</sub>, the extent 47S pre-rRNA coding region (light green) and  
712 the encoded 18, 5.8 and 28S rRNAs. The positions of the qPCR amplicons used in ChIP analyses are  
713 indicated, as are the rDNA fragments and pMr100 probe used in psoralen accessibility cross linking  
714 (PAC). B) ChIP-qPCR analysis of Taf1b, RPI and Ubtf occupancy at sites across the rDNA of  
715 *taflb<sup>fl/fl</sup>/p53<sup>-/-</sup>/ERcre<sup>+/+</sup>* MEFs before and 5 days after *taflb* inactivation by 4-HT treatment. The data  
716 derive from 3 biological ChIP replicas each analyzed by qPCR in triplicate. Figure S4 shows a similar

717 ChIP analysis in *taf1b<sup>fl/fl</sup>/ERcre<sup>+/+</sup>* mESCs with mapping of Taf1b, Taf1c and TBP subunits of SL1. C)  
718 PAC reveals a gradual reduction in the amount and mobility of active rDNA chromatin following *taf1b*  
719 inactivation as in B. Upper panel shows a typical psoralen time course analysis of rDNA chromatin  
720 showing the lower mobility of the active “a” and higher mobility of the inactive “i” 1.3kbp BamHI-  
721 BamHI fragment from the rDNA 47S coding region. The lower histogram panel shows the mean active  
722 rDNA fraction estimated from curve fit analysis of the 1.3, 2.4 and 4.7kbp BamHI-BamHI rDNA  
723 fragment profiles in two biological replicas. Error bars indicate the SEM.

724

725 **Figure 3.** Taf1b loss induces depletion of Ubtf from both Spacer and 47S promoters but not from the  
726 adjacent enhancer repeats nor from the 47S gene body. A) DChIP-Seq analysis of Taf1b and Ubtf  
727 occupancy across the rDNA repeat in *taf1b<sup>fl/fl</sup>/p53<sup>-/-</sup>/ERcre<sup>+/+</sup>* MEFs before (Taf1b<sup>+</sup>) and 5 days after  
728 *taf1b* inactivation (Taf1b<sup>-</sup>).  $\Delta$ Ubtf indicates the difference map of Ubtf occupancy after Taf1b depletion  
729 minus the occupancy before Taf1b depletion. B) Magnified view of the DChIP mapping in A showing  
730 detail over the promoter and enhancer regions. C) Analysis of Spacer and 47S promoter occupancies  
731 reveals a direct proportionality between Taf1b and Ubtf. Four independent DChIP Ubtf and Taf1b data  
732 sets displaying different levels of Taf1b depletion were quantitatively analyzed for Ubtf and Taf1b  
733 promoter occupancy by peak fit, examples of which are shown in Figure S6. The fractions of SL1  
734 (Taf1b) and Ubtf on each promoter after Taf1b depletion are plotted one against the other and reveal  
735 near linear relationships. Error bars in C show the SEM associated with peak fitting and.

736

737 **Figure 4.** The rDNA promoters specifically recruit the Ubtf1 variant. A) Schematic representation of  
738 the domain structure of the Ubtf splice variants in mouse and human indicating the N-terminal  
739 dimerization, 6 HMGbox domains and the C-terminal Acidic Domain. B) DChIP-Seq mapping profiles  
740 of exogenously expressed 3xFLAG-Ubtf1 or Ubtf2, and endogenous Taf1b in NIH3T3 MEFs, see also  
741 Figure S7. The difference map of Ubtf1-Ubtf2 occupancies reveals a strong selectivity for Ubtf1



742 mapping precisely over the Spacer and 47S promoters. C) Magnified view of the DChIP mapping in B  
743 showing detail over the promoter and enhancer regions. D) Peak fit analysis of Ubtfl and Ubtf2  
744 occupancies over the Spacer and 47S promoter revealed that Ubtfl was at least 4 times more prevalent  
745 at either promoter. The data derive from two biological replicas and the SEM is shown.

746

747 **Figure 5.** The E210K Ubtf mutation suppresses both proliferation and 47S pre-rRNA synthesis but  
748 enhances rDNA activation. A) *ubtf*<sup>E210K/E2109K</sup> MEFs were found to proliferate significantly more  
749 slowly than isogenic wild type (*Ubtf*<sup>wt/wt</sup>) MEFs. Doubling time (dt) was estimated from an exponential  
750 curve fit as respectively 35h and 31h for mutant and wild type MEFs. B) 47S pre-rRNA synthesis in  
751 *Ubtf*<sup>E210K/E2109K</sup> and wild type MEFs determined by metabolic pulse (30 min) labelling. See also Figure  
752 S9A for analysis of processing intermediates at increasing labelling times for individual MEF isolates.  
753 C) Per cell total cellular RNA content of *Ubtf*<sup>E210K/E2109K</sup> and wildtype MEFs. The data in A, B and C  
754 derive from two or more biological replicas in each of which a minimum of two independently isolated  
755 mutant and wild type MEF cultures were analyzed in parallel. D) PAC analysis of *Ubtf*<sup>E210K/E2109K</sup> and  
756 wild type MEFs. Upper panel shows an example of the active rDNA “a” and inactive “i” profiles for  
757 the 1.3kbp BamHI-BamHI 47S coding region fragment (see Figure 2A) and the lower panel  
758 corresponding band intensities. profiles. E) Active rDNA fractions were estimated from the combined  
759 curve fit analysis of 1.3, 2.4 and 4.7kbp BamHI-BamHI rDNA fragment PAC profiles. The data derive  
760 from three independent *Ubtf*<sup>E210K/E2109K</sup> and two wild type MEF isolates in two PAC biological replicas  
761 and are plotted to show median, upper and lower data quartiles and outliers. F) and G) Analysis of  
762 Ubtfl and 2 levels in *Ubtf*<sup>E210K/E2109K</sup> and wild type MEF isolates. Panel F shows a typical Western  
763 analysis of Ubtf variants in these MEFs and panel G quantitative estimates of relative Ubtfl/Ubtf2  
764 protein and mRNA ratios in these MEFs. H) and J) Show similar estimates of relative Ubtfl/Ubtf2  
765 protein and mRNA ratios in Cortex and Cerebellum tissue from matched *Ubtf*<sup>wt/wt</sup>, *Ubtf*<sup>wt/E2109K</sup> and  
766 *Ubtf*<sup>E210K/E2109K</sup> adult mice. Error bars throughout indicate SDM.



767

768 **Figure 6.** The E210K mutation in Ubtf suppresses both the RPI loading across the rDNA and  
769 preinitiation complex formation at the Spacer and 47S promoters. A) ChIP-qPCR analysis of RPI  
770 occupancy at the Spacer promoter within the ETS region of the 47S coding region in *Ubtf*<sup>E210K/E2109K</sup>  
771 and wild type MEFs. B) ChIP-qPCR analysis of relative preinitiation complex formation in  
772 *Ubtf*<sup>E210K/E2109K</sup> and wild type MEFs. The data show the mean occupancy at amplicons SpPr and T0/Pr  
773 by Taf1b or Ubtf. The data in A and B derive from 4 independent ChIP-qPCR experiments and error  
774 bars indicate the SEM, see Figure 2A and Materials and Methods for amplicon positions. C), D) and E)  
775 DChIP-Seq mapping of Taf1b, Ubtf and RPI across the rDNA of *Ubtf*<sup>E210K/E2109K</sup> and wild type MEFs.  
776 Panels D and E show an enlargement of the rDNA promoter and Enhancer region and a difference map  
777 of Ubtf occupancy (mutant - wild type MEFs). A full-width Ubtf difference map is shown in Figure  
778 S10. The data are typical of two biological replicas.

779

780 **Figure 7.** Diagrammatic representation of the induce-fit model for cooperative Ubtf1-SL1 recognition  
781 and binding at the rDNA promoters. A) Neither Ubtf1 nor SL1 alone is able to form a stable interaction  
782 with the promoters. B) Ubtf1 binding induces a transient reshaping of the promoter that allows SL1 to  
783 form weak DNA interactions. C) Tightening of Ubtf contacts induces further promoter reshaping  
784 inducing a new DNA surface that closely “fits” the DNA interaction surface of SL1. The promoter and  
785 flanking DNA sequences are shown respectively in orange and dark grey, the region of Ubtf known to  
786 bend DNA is shown in blue, SL1 in light grey, and the active transcription initiation site is by an arrow.

787

788

789 **SUPPORTING INFORMATION CAPTIONS**

790 **SUPPORTING RESULTS**

791 **The Taf1B gene is essential for mouse development beyond early blastula.**

792 Mouse lines carrying a targeted “Knockout First” insertion in the gene for Taf1B (Taf68), were  
793 established and these crossed to remove the  $\beta$ -Gal and Neo cassette insertion, generating lines carrying  
794 lox sites flanking exons 4 and 5 of *taf1b* (Figure S1A and B). Subsequent recombination of these lox  
795 sites inactivated the *taf1b* gene, (Figure S1C), see Supplementary Materials and Methods for more  
796 detail. Mice heterozygous for the *taf1b*<sup>Δ</sup> allele were found to be both viable and fertile and the null-  
797 allele was propagated at near Mendelian frequency (Table S1). However, no *taf1b*<sup>Δ/Δ</sup> homozygous  
798 offspring (pups) were identified and genotyping of embryos detected no *taf1b*<sup>Δ/Δ</sup> homozygotes at stages  
799 6.5 and later. In contrast, four *taf1b*<sup>Δ/Δ</sup> embryos were detected at 3.5 dpc, though only one of these  
800 displayed a recognizable blastula morphology (Figure S1D and E). It was concluded that *taf1b* was  
801 essential for mouse development beyond blastula but that maternal Taf1B mRNA or protein, or simply  
802 ribosome availability may have been sufficient to support development beyond the morula stage. This  
803 is fully consistent with the previous data for inactivation of the TBP gene *tbp/gtf2d* (47), and suggests  
804 the interesting possibility that the effects of TBP-loss on early development could in large part be due  
805 to inactivation of RPI transcription. In support of this possibility, the SL1 complex is known to be  
806 generally less abundant than the RPII/PolIII TFIID complex (48) and so could be limiting for embryo  
807 growth. Further, inactivation of the genes for the RPI factors *Ubtf (ubtf)* and *Rrn3/TIF1A (rrn3)* arrest  
808 mouse development during early cleavage stages (24, 26). A similar argument could be made for  
809 inactivation of RPIII/PolIII transcription since loss of the *Brf1* subunit of the TFIIB complex also  
810 causes developmental arrest during early cleavage stages (49). We conclude that the maternal protein  
811 translation machinery is limiting in the cleavage embryo and must be replenished by zygotic expression  
812 to allow further development.

813

814 **SUPPORTING TABLE**

| Age (dpc)   | Total No. | <i>Taf1b</i> <sup>wt/wt</sup> | <i>Taf1b</i> <sup>Δ/wt</sup> | <i>Taf1b</i> <sup>Δ/Δ</sup> |
|-------------|-----------|-------------------------------|------------------------------|-----------------------------|
| 3.5         | 20        | 3 (15%)                       | 13 (65%)                     | 4 (20%)                     |
| 6.5         | 23        | 12 (52%)                      | 11 (48%)                     | 0 (0%)                      |
| 7.5         | 15        | 6 (40%)                       | 9 (60%)                      | 0 (0%)                      |
| 8.5         | 35        | 8 (23%)                       | 27 (77%)                     | 0 (0%)                      |
| 9.5         | 16        | 4 (25%)                       | 12 (75%)                     | 0 (0%)                      |
| <b>Pups</b> | 112       | 35 (31%)                      | 77 (69%)                     | 0 (0%)                      |

815

816 **Table S1.** Numbers and genotypes of embryos and pups derived from matings of *Taf1b*<sup>+/-</sup> mice.

817

818 **SUPPORTING FIGURE LEGENDS**

819 **Figure S1.** Construction and phenotypic effects of the mutant *taf1b* alleles A) Organisation of the first  
820 8 exons of the mouse *taf1b* gene (*taf1b*<sup>wt</sup>), and the “flox-neo” insertion, “floxed” and alleles indicating  
821 the position of inserted FRT and Lox sites and the inactivated (*taf1b*<sup>Δ</sup>) allele after Lox site  
822 recombination to delete exons 4 and 5. The positions of genotyping primers A to D are also indicated.  
823 B) Examples of mouse PCR genotyping. C) alignment of the N-terminal sequence of wild type Taf1b  
824 with the predicted residual Taf1b peptide encoded by the *taf1b*<sup>Δ</sup> allele. D) Typical images of mouse  
825 embryos at 3.5 dpc derived from *taf1b*<sup>wt/Δ</sup> mouse crosses. The corresponding genotypes and numbers of  
826 embryos in each class are indicated, see also Table S1. E) Embryo phenotyping using primers A and D  
827 shown in panel A.

828

829 **Figure S2.** Time course of rRNA synthesis after *taf1b* inactivation in MEFs. Conditional *taf1b*<sup>fl/fl</sup>/*p53*<sup>-/-</sup>  
830 */ERcre*<sup>+/+</sup> and control *taf1b*<sup>wt/wt</sup>/*p53*<sup>-/-</sup>/*ERcre*<sup>+/+</sup> MEFs were treated with 50 nM 4-hydroxy-tamoxifen  
831 (4-HT) for 4 h (4-HT pulse) before removing 4-HT by a change of the culture medium. 47S pre-rRNA  
832 synthesis was then determined by [3H]-uridine RNA metabolic labelling. The panels show the parallel  
833 time course analyses post 4-HT treatment of; A) *taf1b* inactivation, B) [3H]-rRNA labelling versus  
834 steady state 28S rRNA, and C) Taf1b protein depletion. The 47S pre-rRNA and rRNA processing

835 products are indicated in B. The “\*” in C indicates a non-specific antibody interaction that serves as a  
836 loading control.

837

838 **Figure S3.** Time course of parallel *in situ* immunofluorescence labelling of RPI, Ubtf and fibrillarin  
839 (Fbl) in *tafl1b<sup>fl/fl</sup>/p53<sup>-/-</sup>/ERcre<sup>+/+</sup>* MEFs after 4-HT induction of *tafl1b* inactivation. Single confocal image  
840 planes are shown as for each factor and as merged overlays each with DAPI staining of DNA.

841

842 **Figure S4.** ChIP-qPCR analysis of Taf1b, Taf1c, Tbp and Ubtf occupancy at sites across the rDNA of  
843 *tafl1b<sup>fl/fl</sup>/ERcre<sup>+/+</sup>* mESCs before and after *tafl1b* inactivation by 4-HT treatment. The data for Taf1b and  
844 Ubtf derive from 3 ChIP biological replicas and for Taf1c and Tbp a single ChIP each analyzed by  
845 qPCR in triplicate.

846

847 **Figure S5.** Taf1b depletion in condition *tafl1b<sup>fl/fl</sup>/ERcre<sup>+/+</sup>* mESCs also induces depletion of Ubtf from  
848 both Spacer and 47S promoters but not from the adjacent enhancer repeats or from the 47S gene body.  
849 A) DChIP-Seq analysis of Taf1b and Ubtf occupancy across the rDNA repeat before (Taf1b+) and 3  
850 days after *tafl1b* inactivation (Taf1b-).  $\Delta$ Ubtf indicates the difference map of Ubtf occupancy after  
851 Taf1b depletion minus the occupancy before Taf1b depletion. B) Magnified view of the DChIP  
852 mapping in A showing detail over the promoter and enhancer regions. C) Comparative Western blots of  
853 Ubtf from Taf1b conditional MEFs (*tafl1b<sup>fl/fl</sup>/p53<sup>-/-</sup>/ERcre<sup>+/+</sup>*) and mESCs (*tafl1b<sup>fl/fl</sup>/ERcre<sup>+/+</sup>*), showing  
854 the presence of both Ubtf1 and Ubtf2 variants are expressed in the MEFs but only the Ubtf1 variant is  
855 expressed in the mESCs.

856

857 **Figure S6.** Analysis of DChIP profiles by Gaussian curve fit before and after *tafl1b* inactivation. A) and  
858 B) respectively show examples of Ubtf and Taf1b enrichment profiles over the 47S promoter region  
859 before and after *tafl1b* inactivation are shown, (dark blue line), and the best Gaussian peak fits to these

860 profiles (dashed red line). In the case of Taf1b the profile closely followed a single Gaussian peak from  
861 which both the position and relative occupancy were determined. Since Ubtf was present not only at  
862 the promoter but also over the adjacent regions, curve fits were made using three Gaussians peaks, and  
863 the central one used to estimate relative occupancy.

864

865 **Figure S7.** Mapping of Ubtf1 and -2 variants across the rDNA unit. A) Expression of exogenous  
866 3xFlag-Ubtf1 and Ubtf2 in NIH3T3 MEFs. Total cell protein extracts from Mock, 3xFlag-Ubtf1 or  
867 3xFlag-Ubtf2 transfected cells were analyzed by Western blot using either anti-Flag ( $\alpha$ Flag), left hand  
868 panel) or anti-Ubtf (Ubtf) antibodies to detect total Ubtf (right hand panel). B) DChIP-Seq mapping  
869 profiles of the exogenously 3xFlag-Ubtf1 or 3xFlag-Ubtf2 (Flag) expressed in NIH3T3 MEFs (as in  
870 Figure 4) and the total endogenous Ubtf profiles ChIPped from the same chromatin preparations.

871

872 **Figure S8.** Analysis of DChIP profiles for Flag-Ubtf1 and -Ubtf2 by Gaussian curve fit. A) and B)  
873 Show examples of Flag-Ubtf1 and Flag-Ubtf2 enrichment profiles respectively over the 47S and  
874 Spacer promoter regions, (dark blue line). The best Gaussian peak fits to these profiles are shown  
875 (dashed red line), as are the individual Gaussian peaks used to estimate relative promoter occupancy.  
876 Since Ubtf was present not only at each promoter but also over adjacent regions, curve fits were made  
877 using three, or in the case of the Spacer promoter four, Gaussians peaks.

878

879 **Figure S9.** Structure prediction for wild type and E210K mutant HMGbox2 of Ubtf1. A) Sequence  
880 alignment of the HMGboxes 1 and 2 of human and mouse Ubtf1 (NM\_014233-2, NP\_035681) with  
881 HMGbox2 of *Xenopus laevis* Ubtf1a (CAA42523.1) and the HMGbox of SOX2 (P48431). The  
882 positions of the predicted DNA intercalating residue, the E210K mutation and the adjacent conserved  
883 basic DNA contacting residue are indicated as are the positions of the  $\alpha$ -helical segments. B)

884 Comparative molecular modelling of Ubt1 HMGbox2 using as templates the structures 1k99 (human  
885 Ubt1 HMGbox1) and 6hb4 (human mitochondrial transcription factor A, TFAM). The two predicted  
886 structures were generated by SWISS-MODEL (50) and are shown individually and as an aligned  
887 overlay generated in ChimeraX-1.1.1 (51). Comparison of these structures using the Matchmaker  
888 routine in ChimeraX-1.1.1 revealed an RMSD of 1.215 Å over 41 of 72 alpha-carbons, including those  
889 of helix 1 affected by the E210K mutation. C) The predicted positions and orientations of the E210 and  
890 K210 residues within the HMGbox2 of Ubt1 are shown relative to the adjacent conserved basic  
891 residue at position 211, which is a lysine in UBTF/Ubt1. The likely other DNA minor groove  
892 contacting residues K198 and K200 are also shown. D) The predicted surface electrostatic potential of  
893 the wild type, left, and the mutant, right, HMGbox2. Blue indicates a positive and red a negative  
894 potential. Position of changes in surface potential due to the E210K mutation are enclosed by an  
895 ellipse.

896

897 **Figure S10.** A) RNA metabolic pulse labelling to reveal 47S pre-rRNA synthesis and processing  
898 products in *Ubt1*<sup>E210K/E210K</sup> knock-in and wild type *Ubt1*<sup>wt/wt</sup> MEFs. Gel fractionation of RNA after  
899 increasing labelling times is shown for two individual (numbered) MEF isolates. B) DNA base  
900 sequence of the differentially spliced region of mouse *Ubt1* gene showing coding exon 6, the  
901 differentially spliced coding exon 7 and coding exon 8 in black and the intervening introns in red  
902 (taken from GRCm38:11:102303960:102320342). The position of the G>A gene mutation, the cause of  
903 the E210K change in the Ubt1 protein, is indicated as are the potential splice branch sites in the  
904 intervening introns that most closely fit the yTnAy consensus (52).

905

906 **Figure S11.** DChIP-Seq difference map of Ubt1 occupancy (*Ubt1*<sup>E210K/E210K</sup> - wild type MEFs) as in  
907 Figure 6D but here shown across the full rDNA repeat. Taf1b and Ubt1 mapping are also shown for  
908 reference.



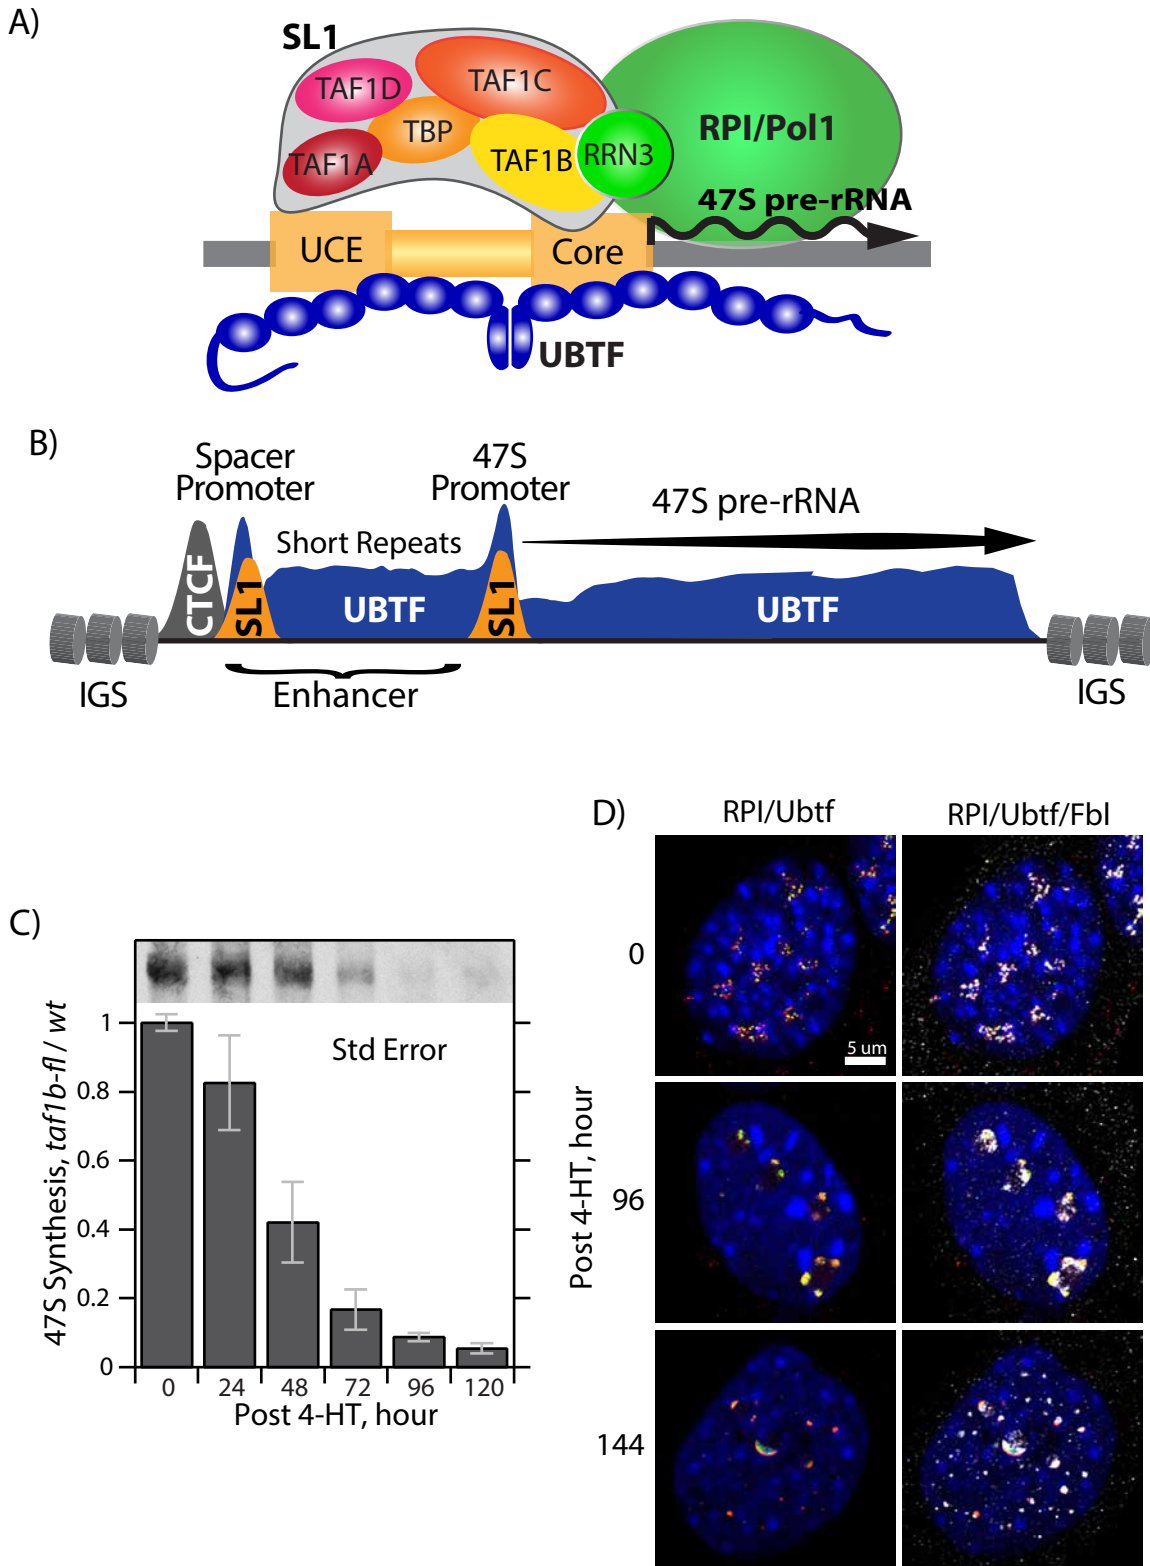



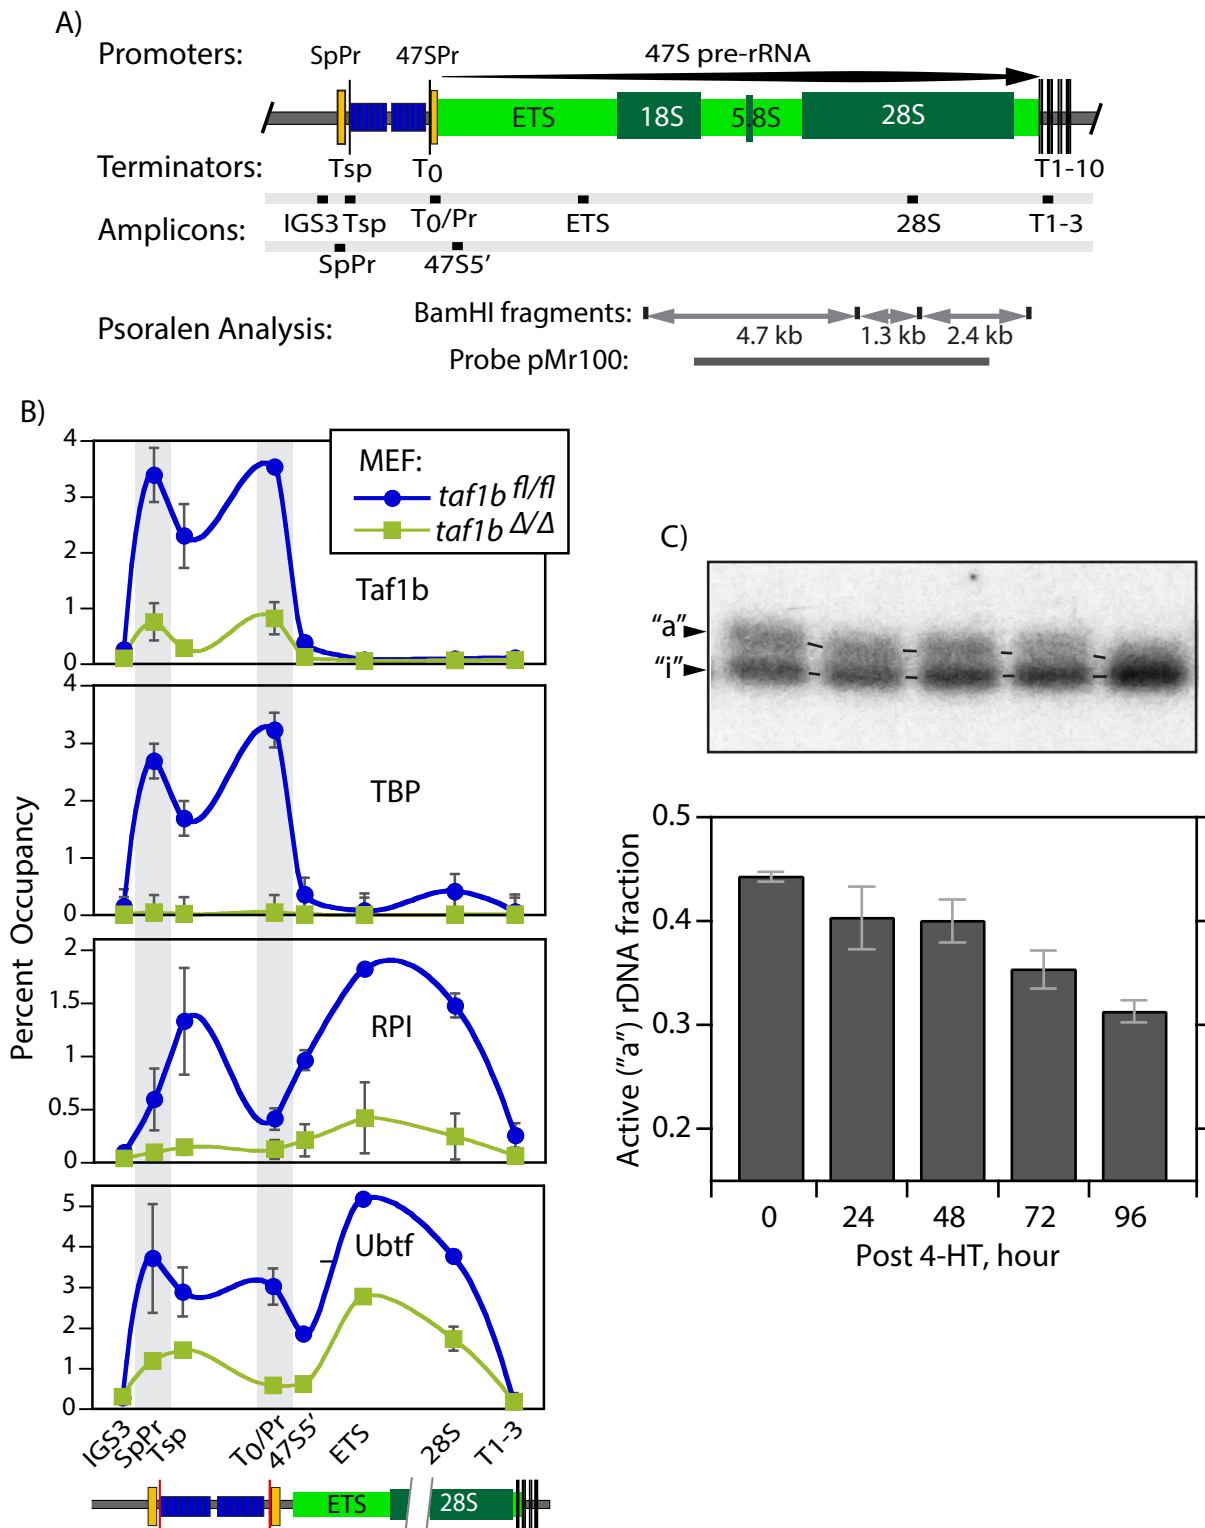

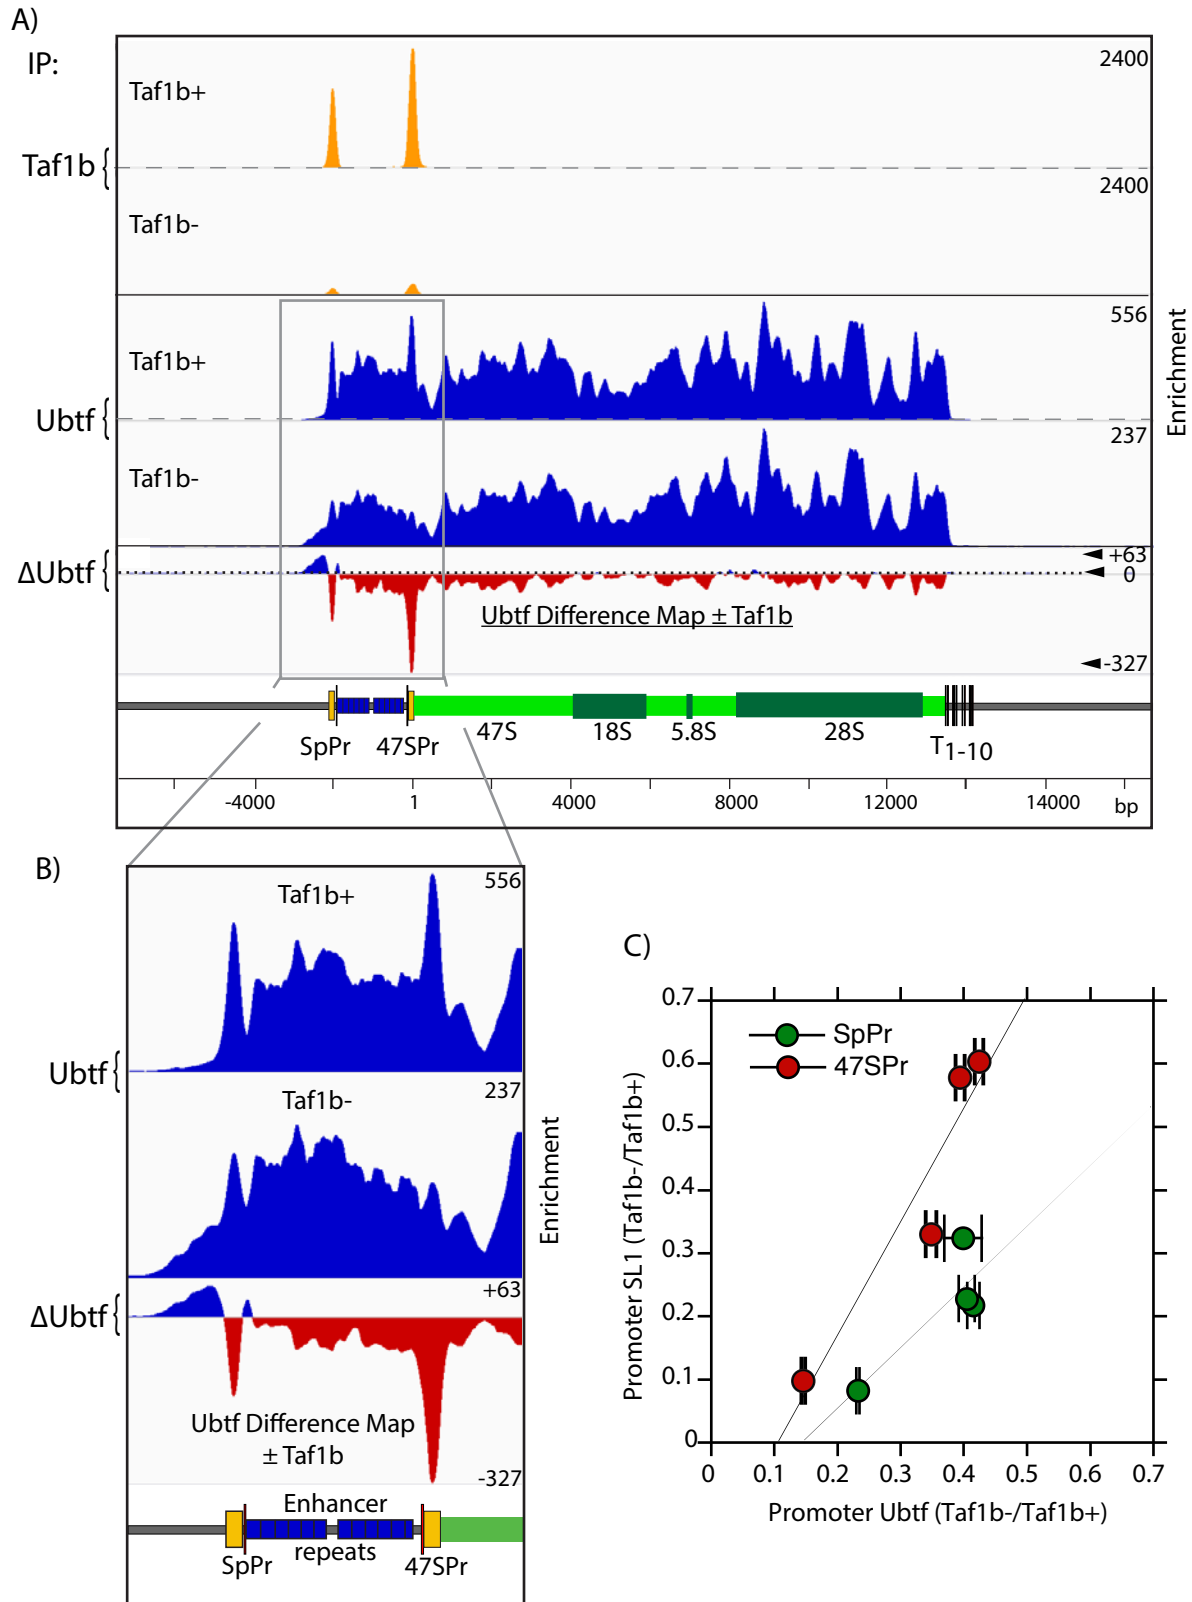

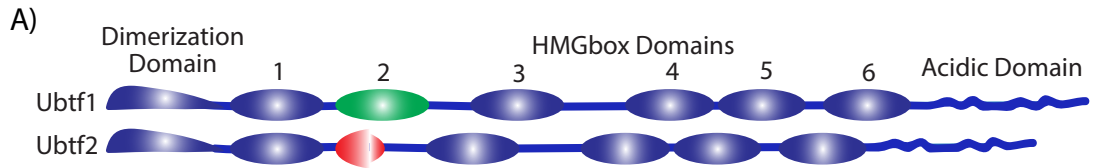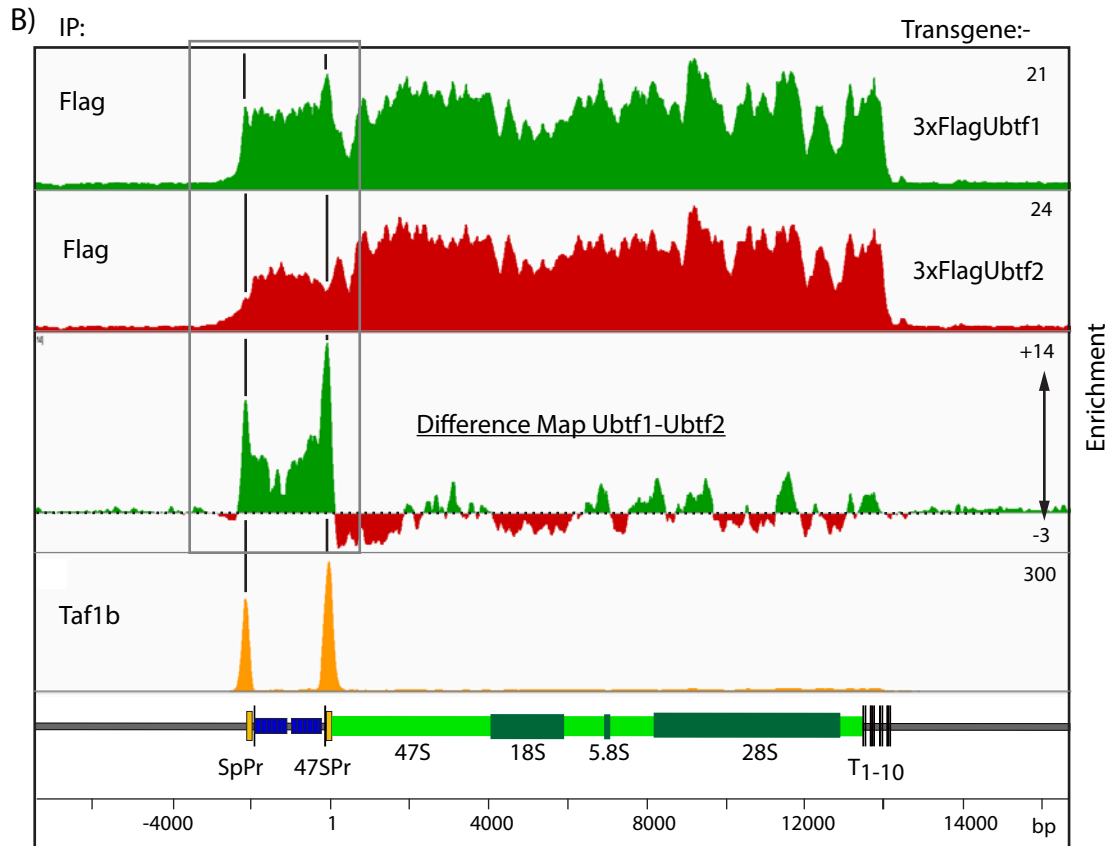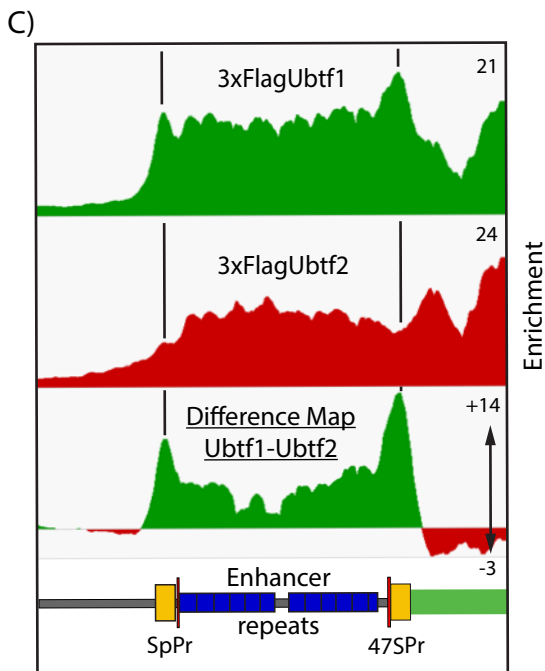

D)

| Ubtf1/Ubtf2 Promoter occupancy |                 |           |
|--------------------------------|-----------------|-----------|
| Promoter:                      | Ubtf1/<br>Ubtf2 | Std Error |
| Spacer                         | 4.2             | 0.7       |
| 47S                            | 4.8             | 2.1       |
| Mean Ratio                     | 4.5             | 0.9       |

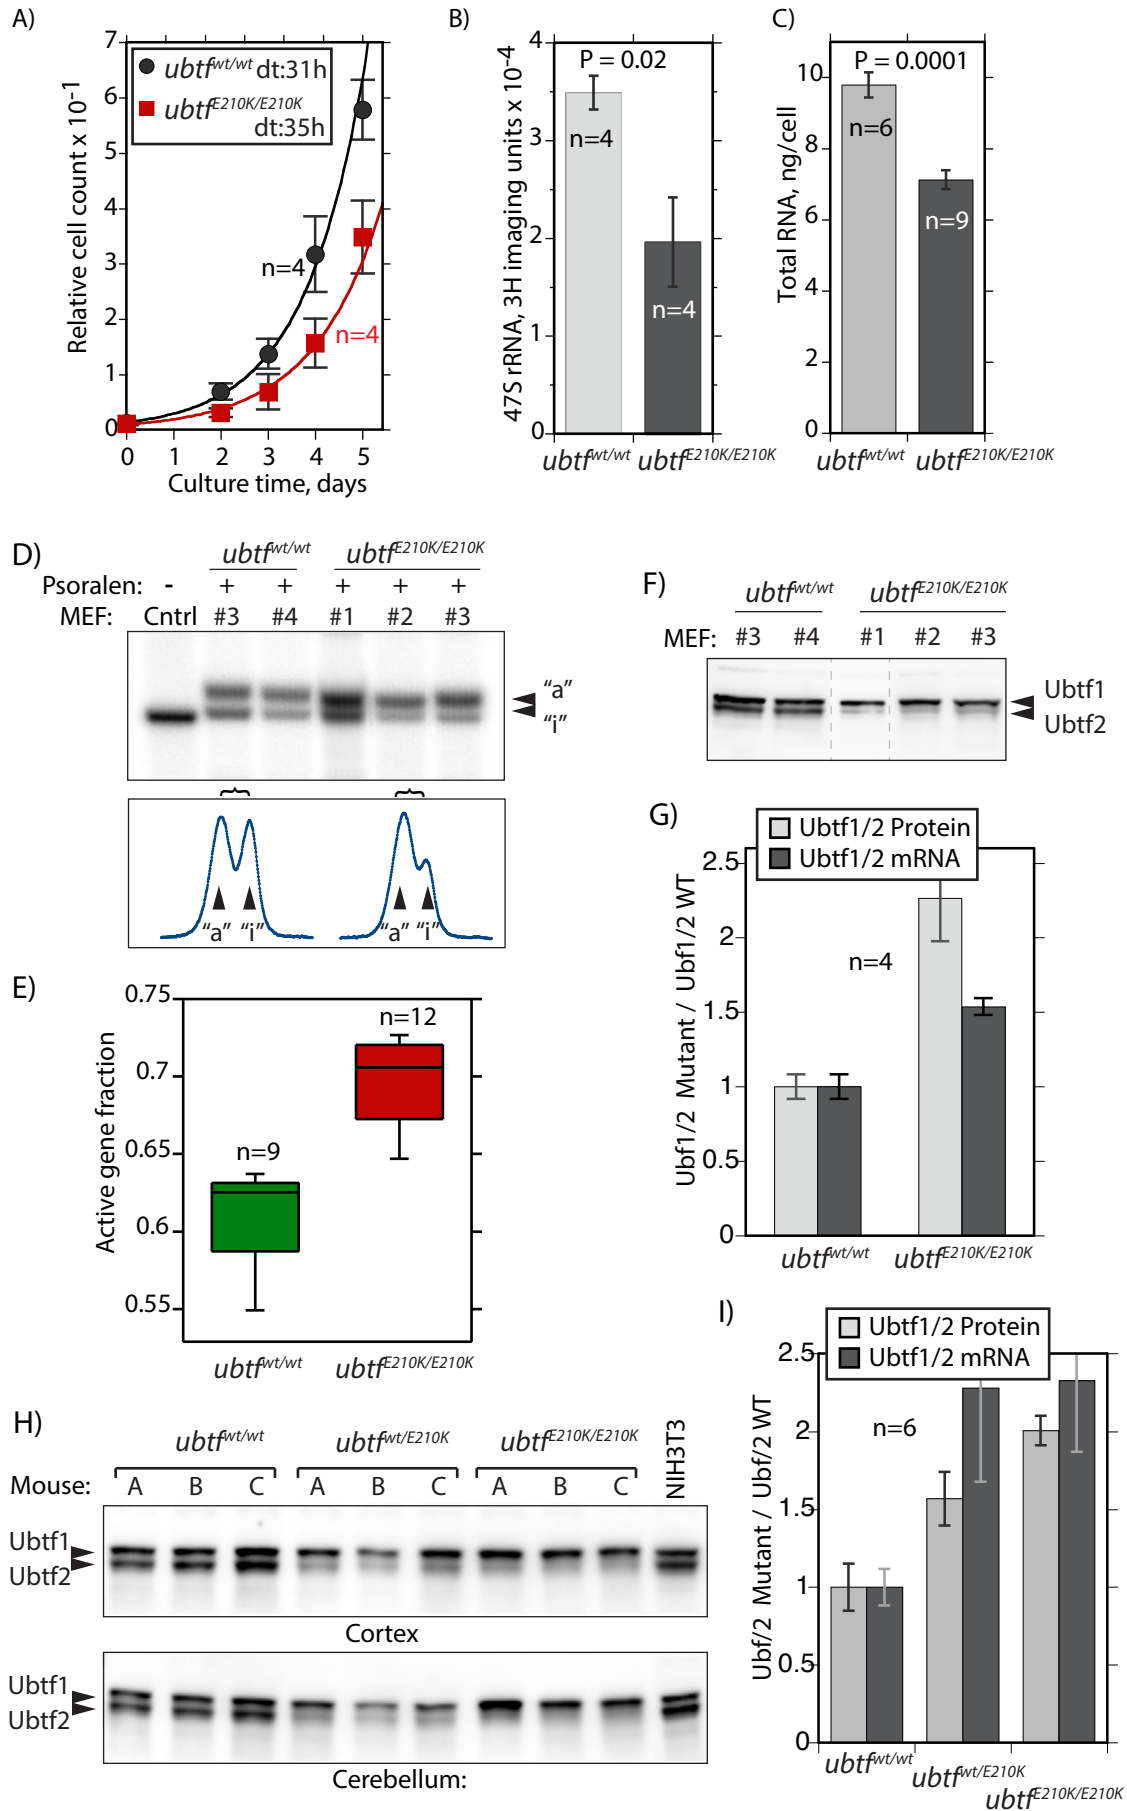

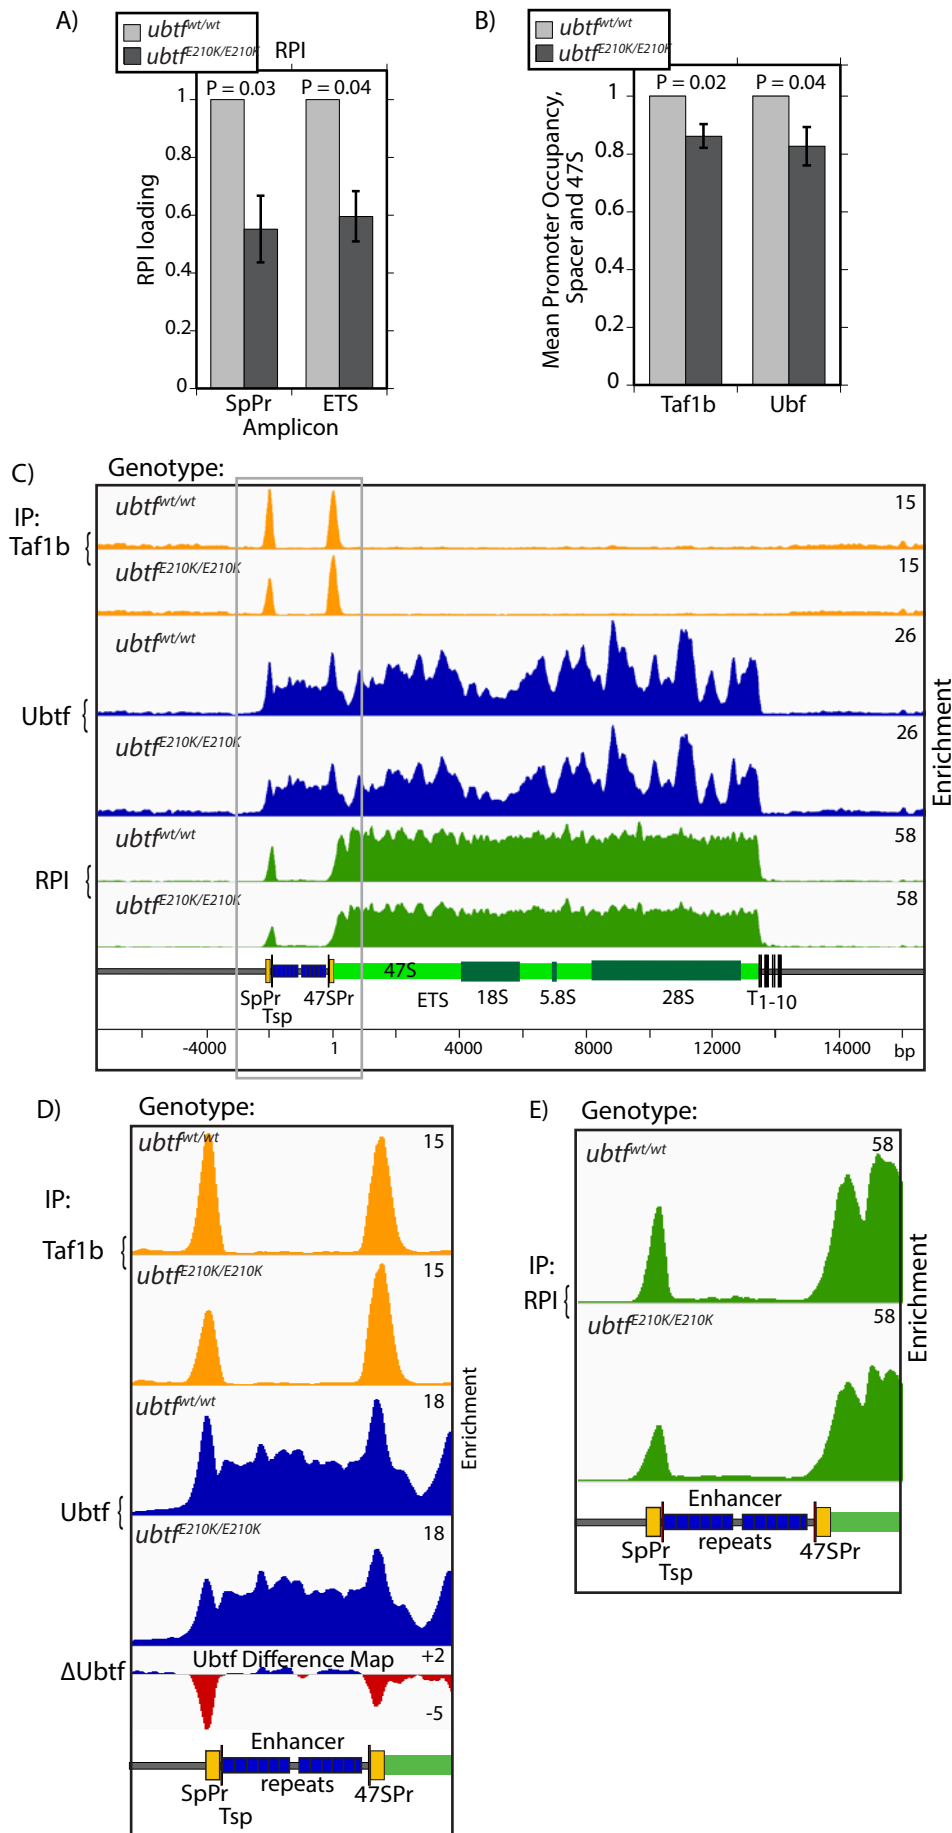

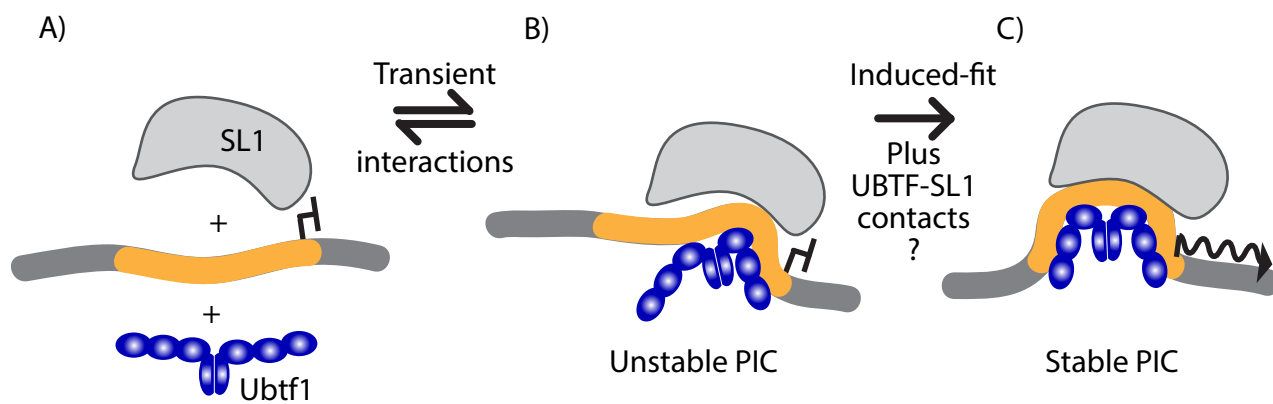

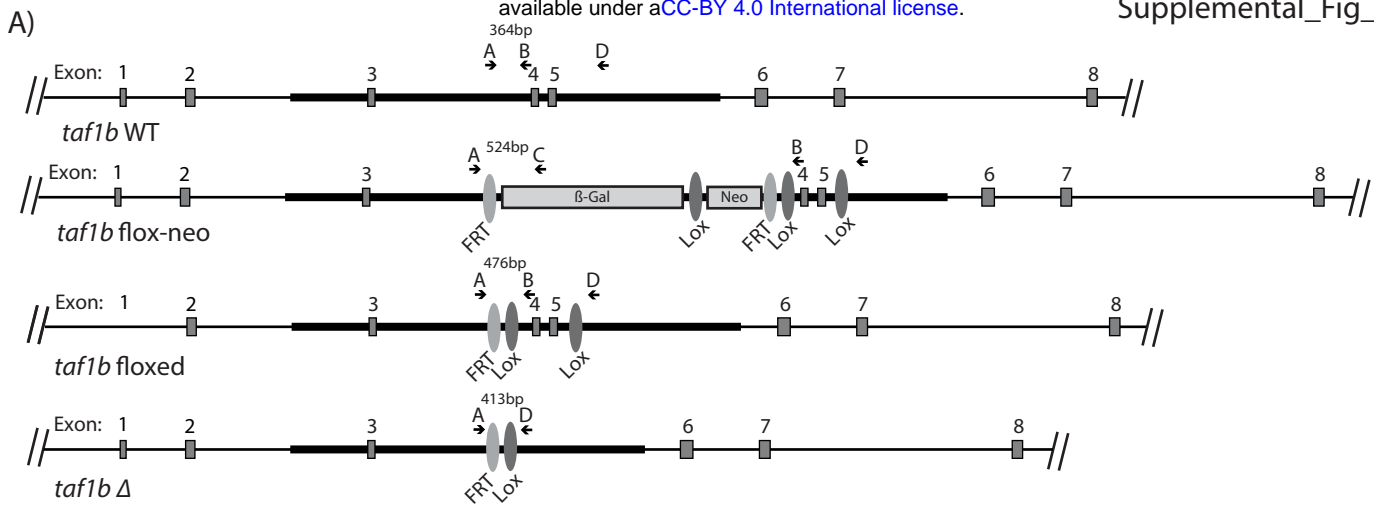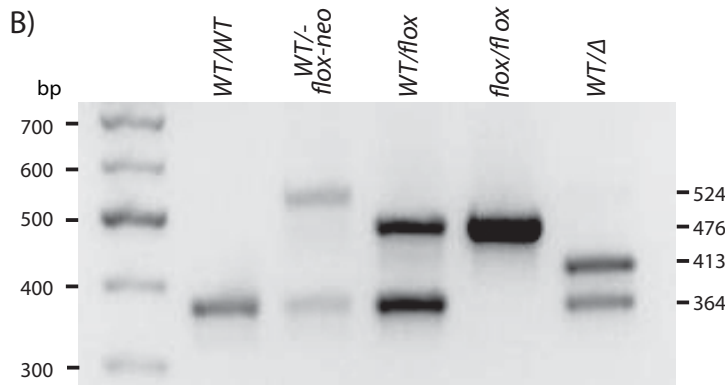

C) Sequence alignment of predicted ORFs for the *taf1b* Δ and *taf1b* wt alleles

Taf1b Δ 1 MDVEEVKAFRDRCSCQAAVSWG L TDEGKYCTSCHNVDRSEEVSAADIPNTKINSINRGLRQRSKHGIRRQC AVLGLGQ\*-----

Taf1b wt 1 MDVEEVKAFRDRCSCQAAVSWG L TDEGKYCTSCHNVDRSEEVSAADIPNTKINSINRGLRQRSKH V Q

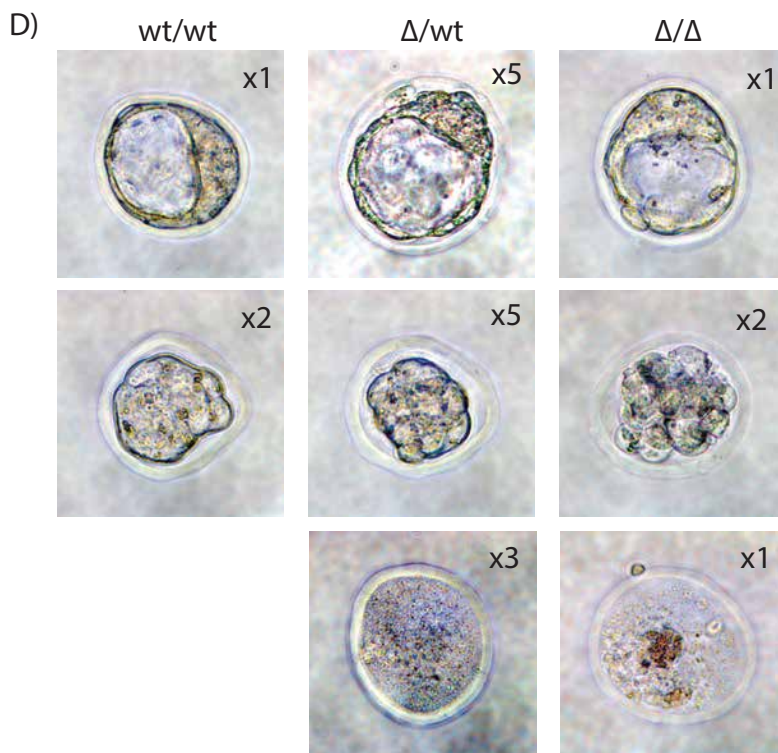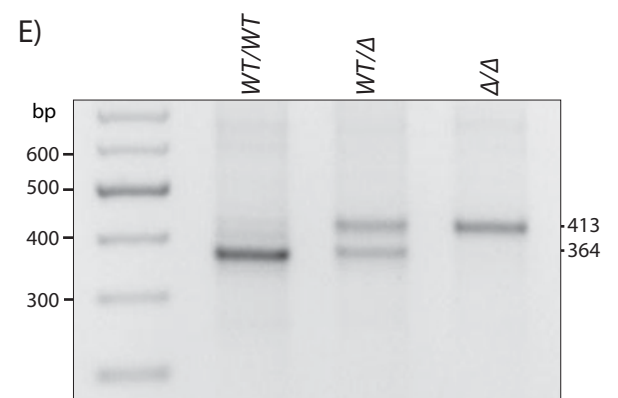

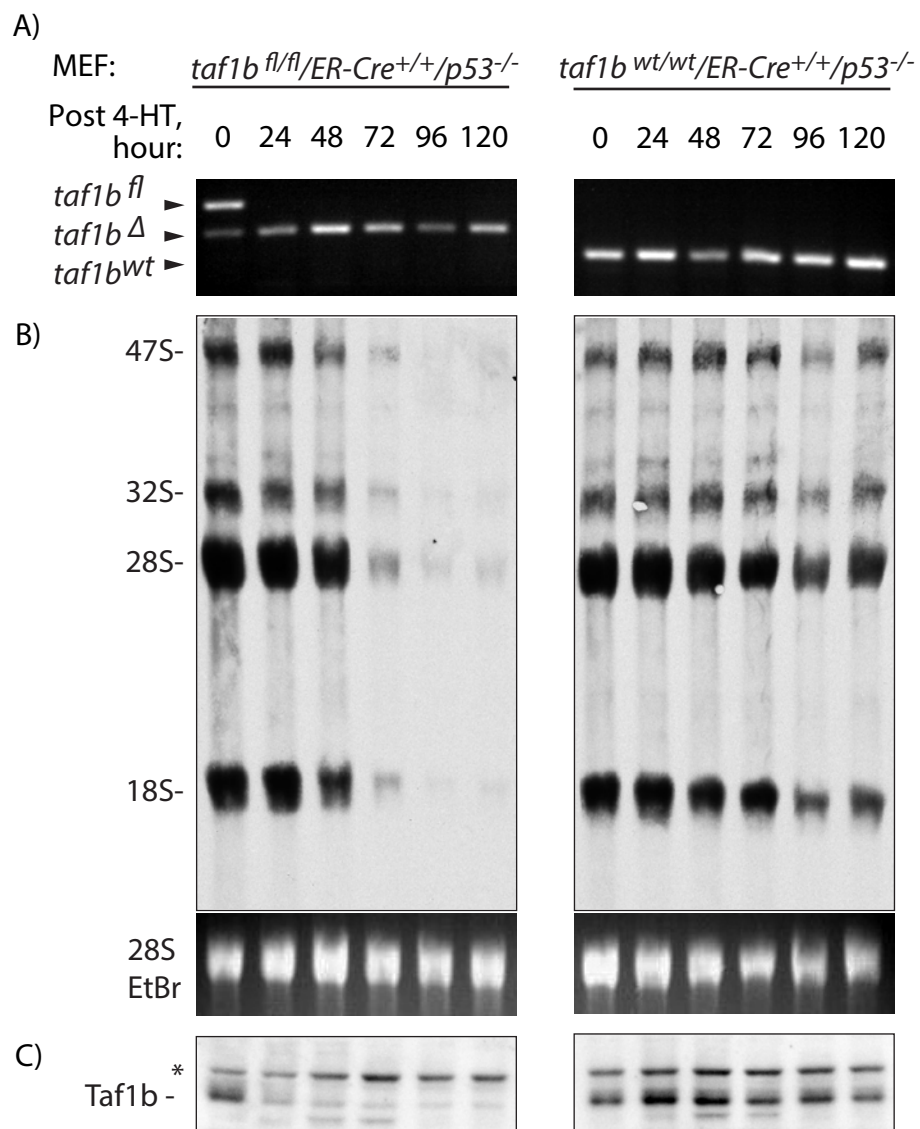



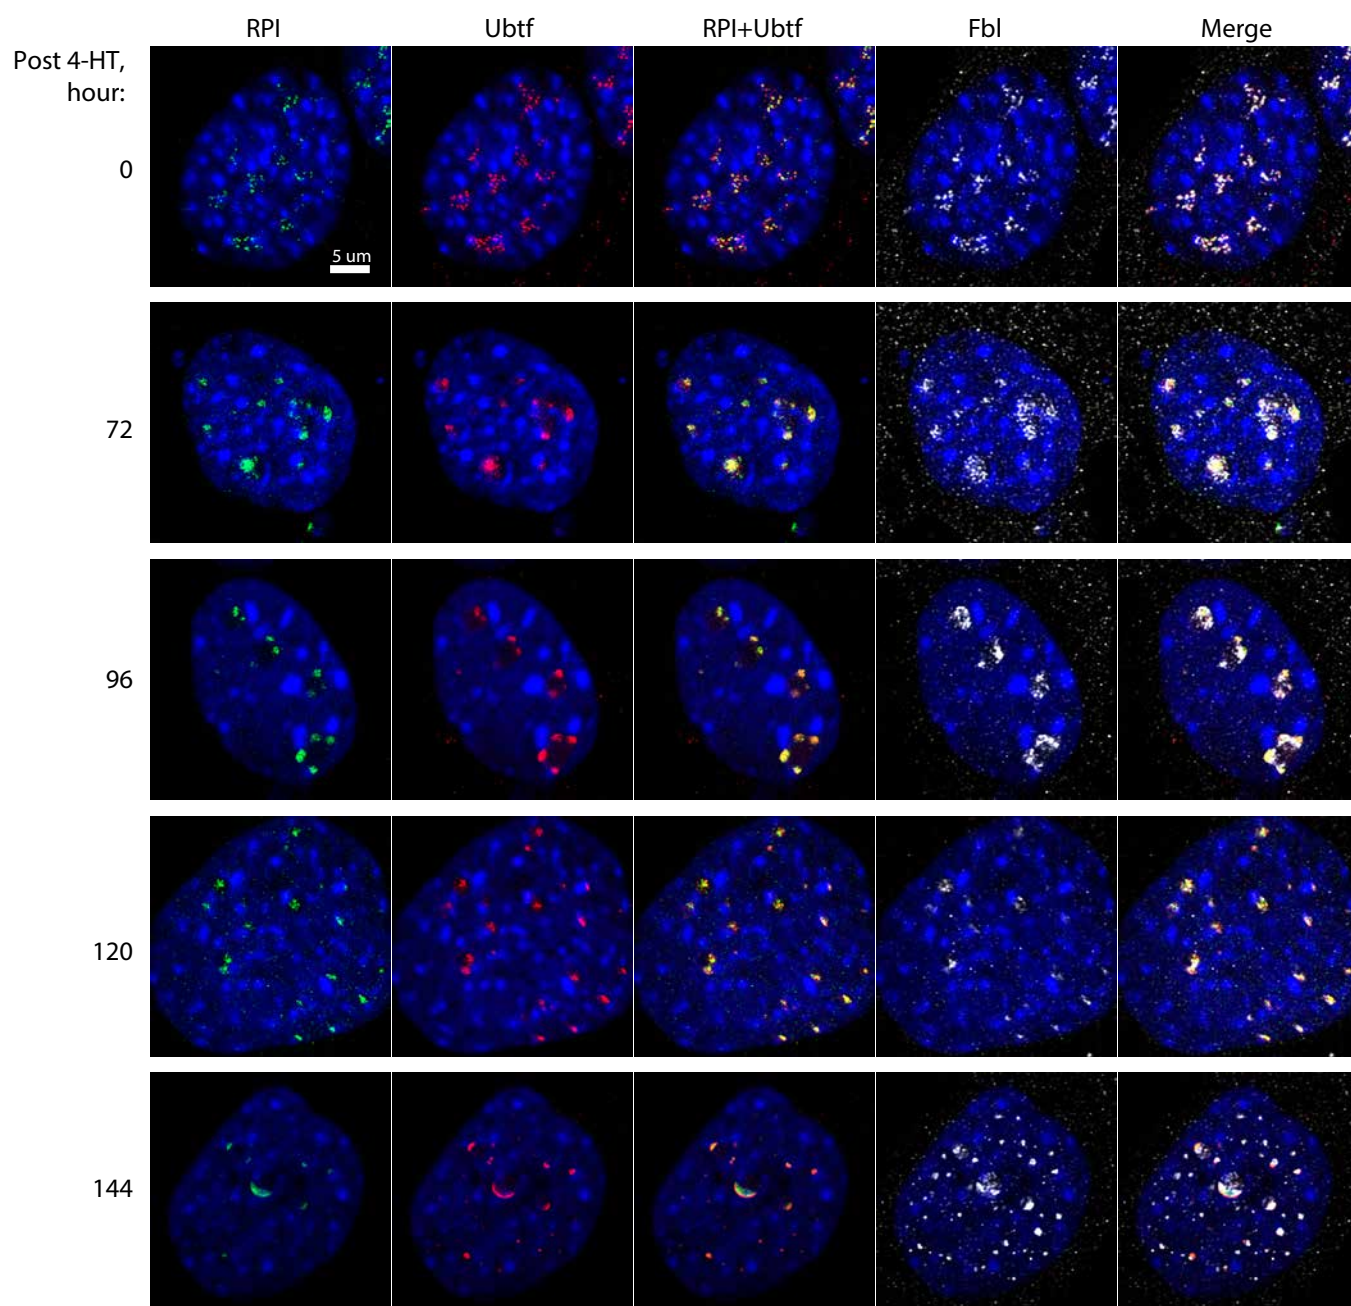

Supplemental\_Fig\_S4.pdf

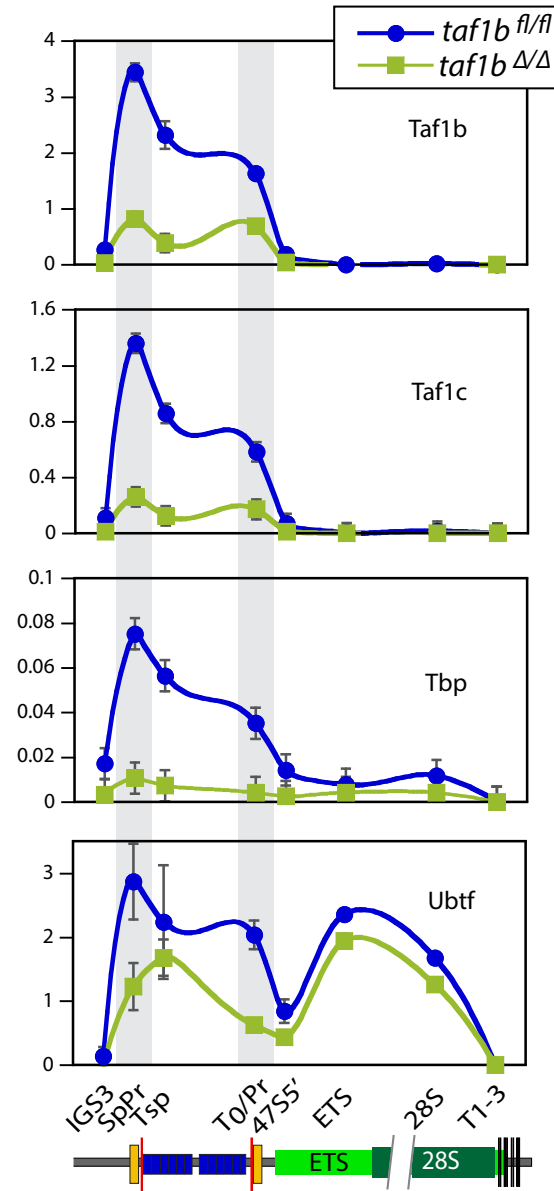

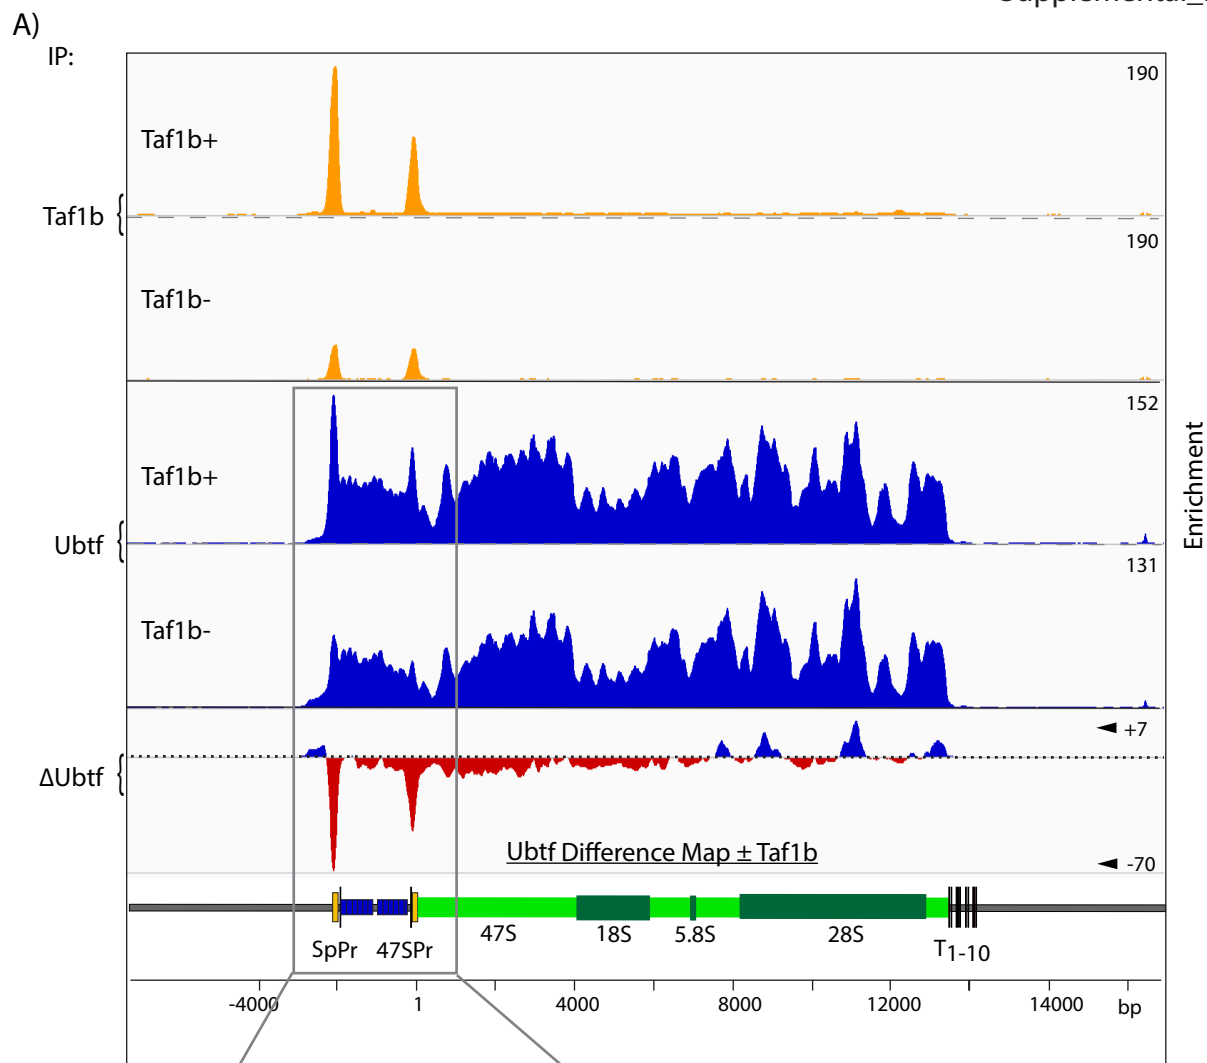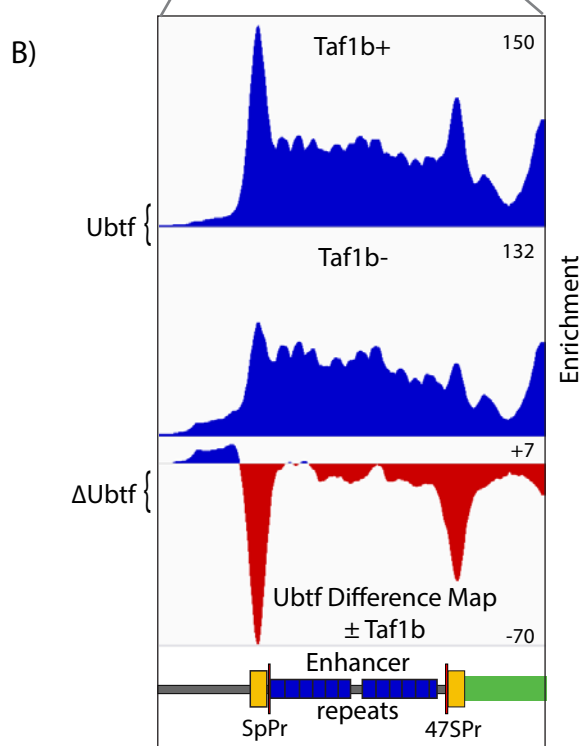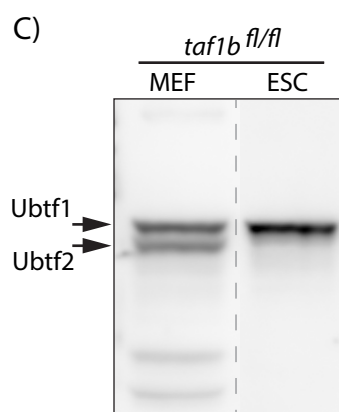

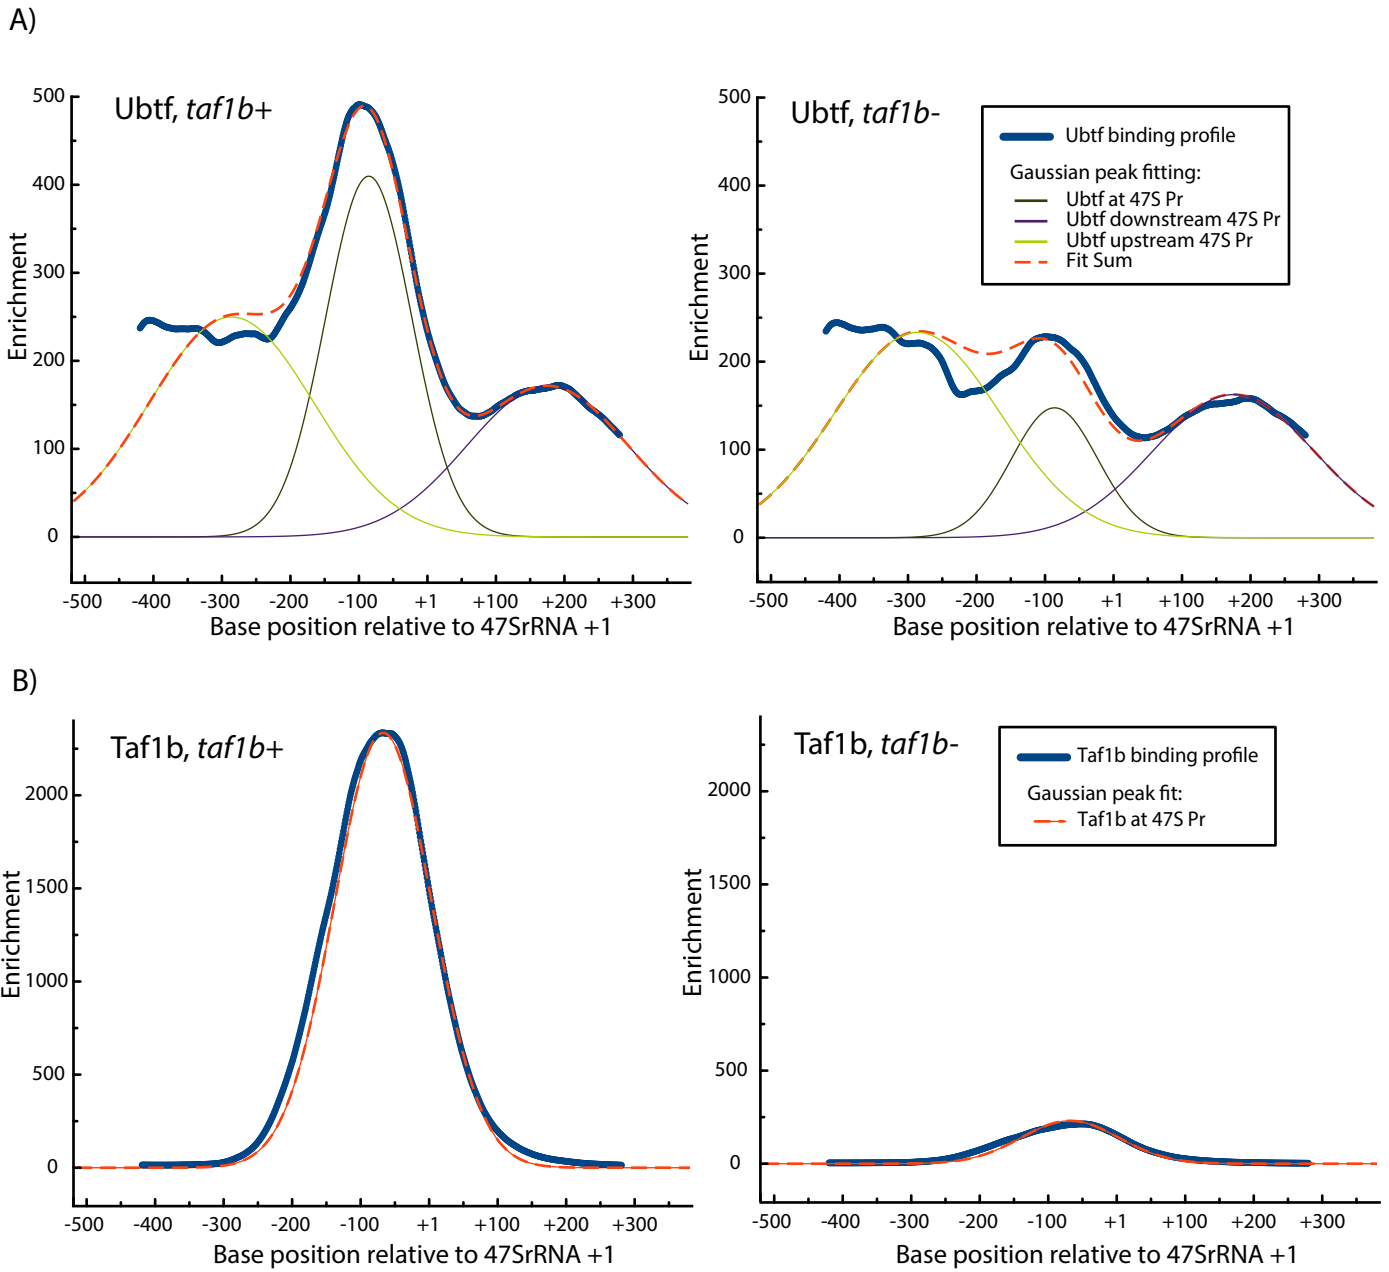

A)

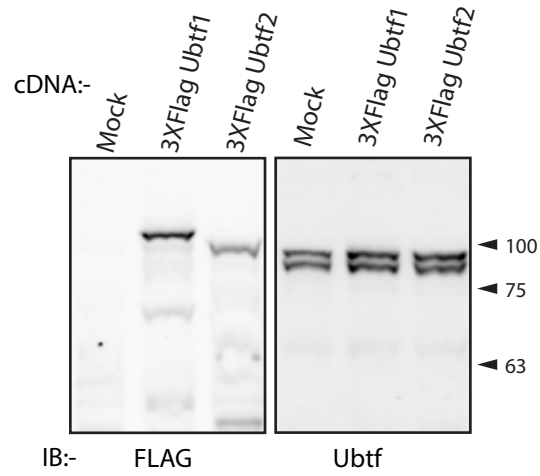

B)

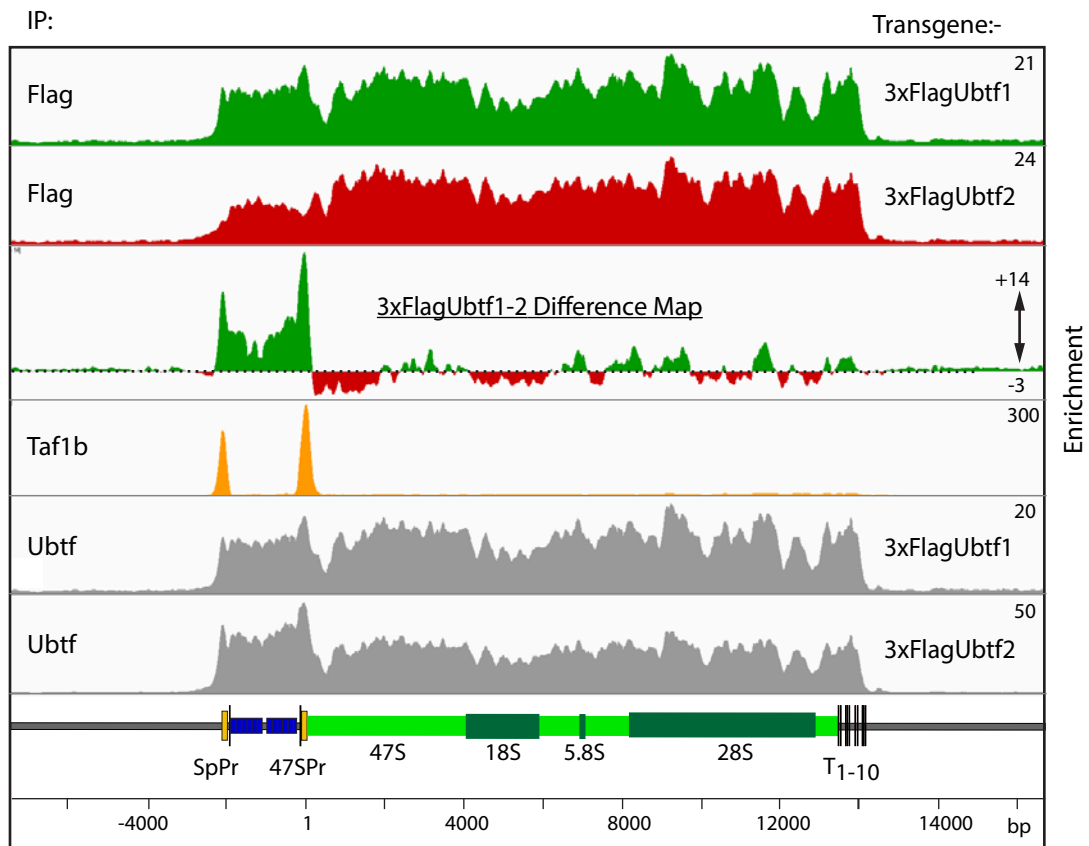

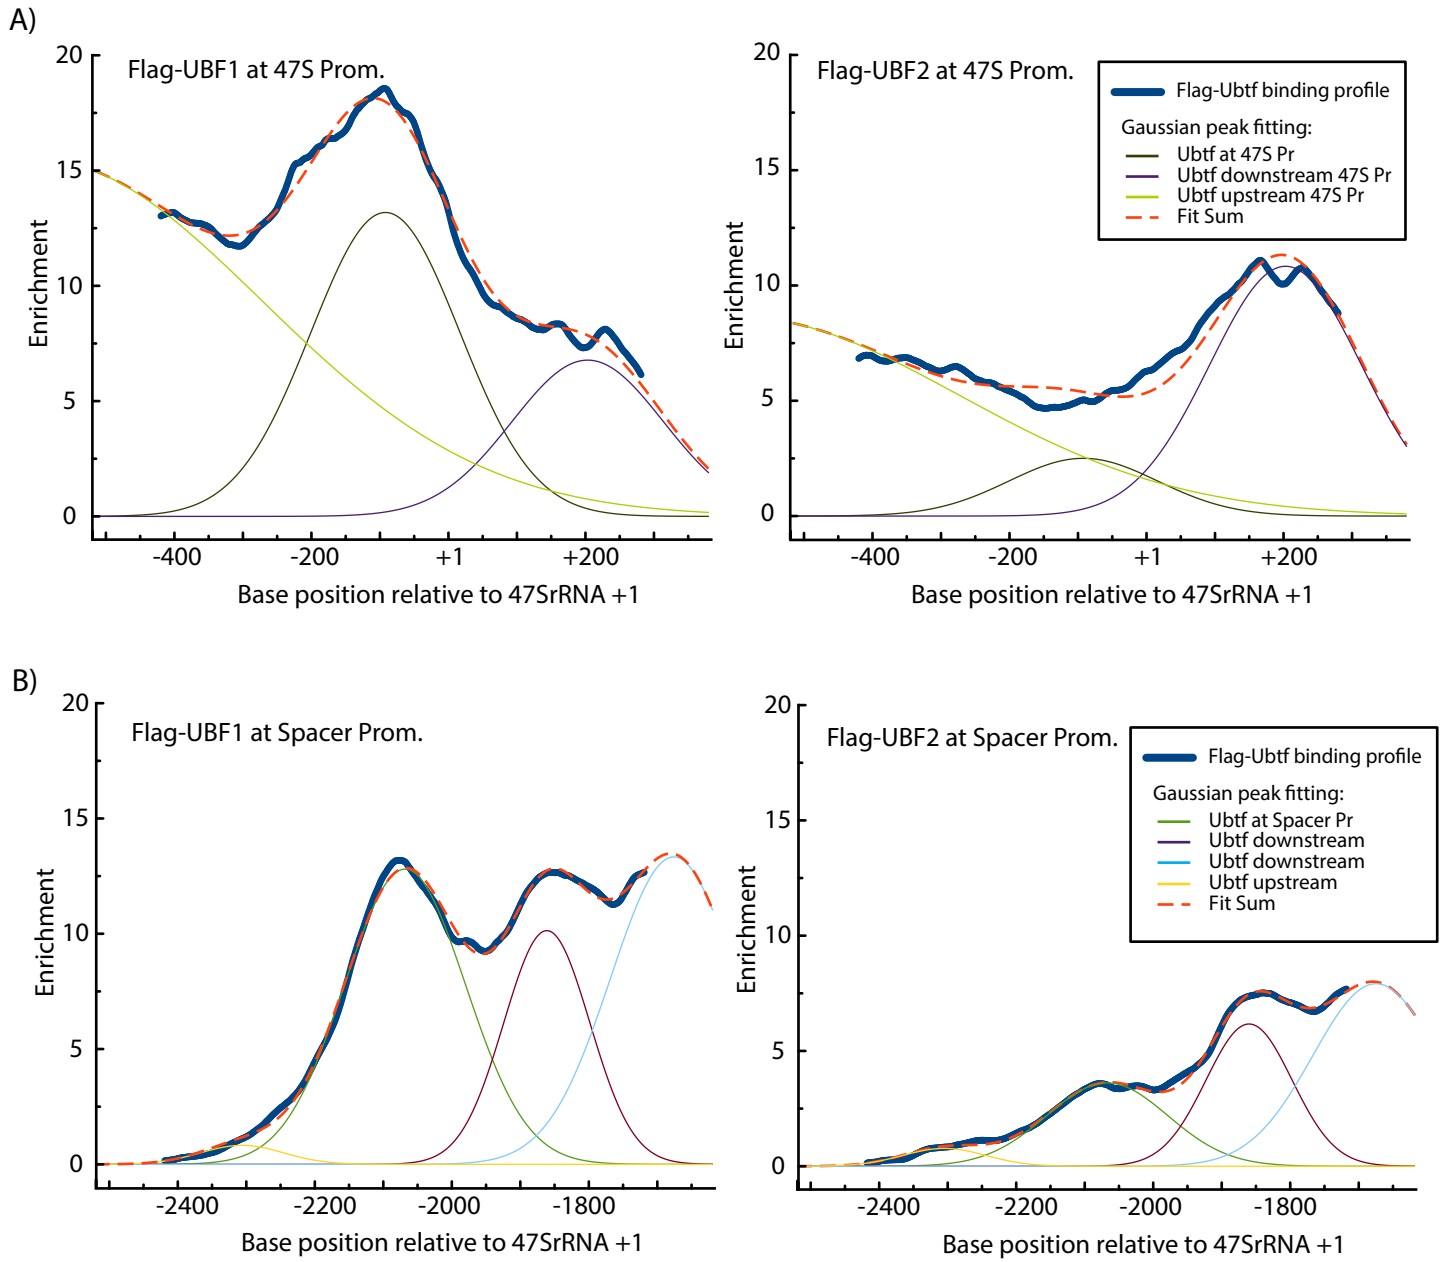

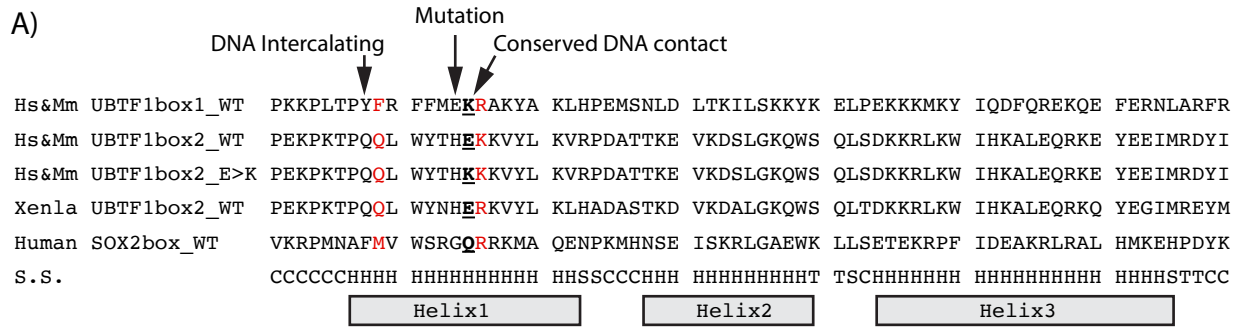

B)

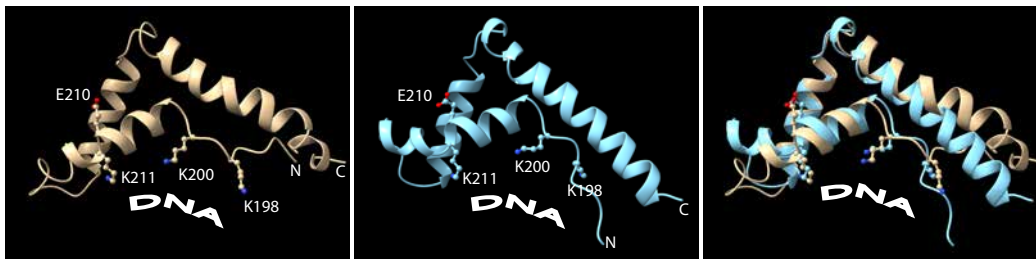

Template: HsUBTF1-HMGbox1 (1k99)

HsTFAM-HMGbox2 (6hb4)

Alignment overlay

C)

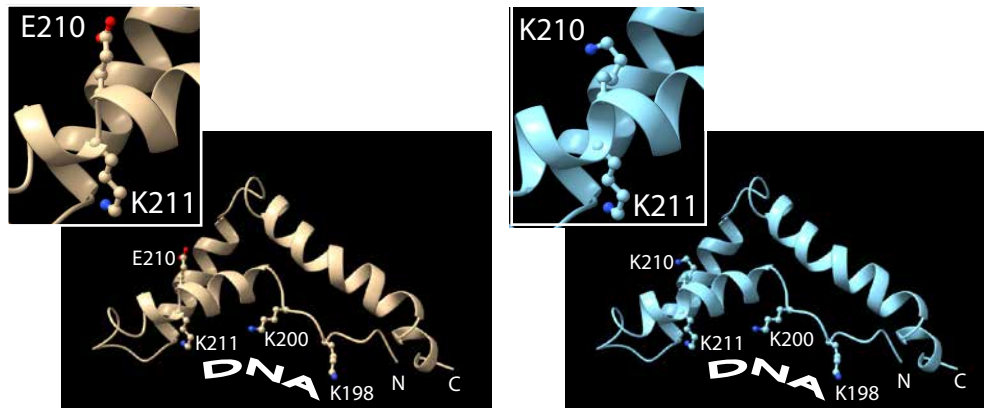

D)

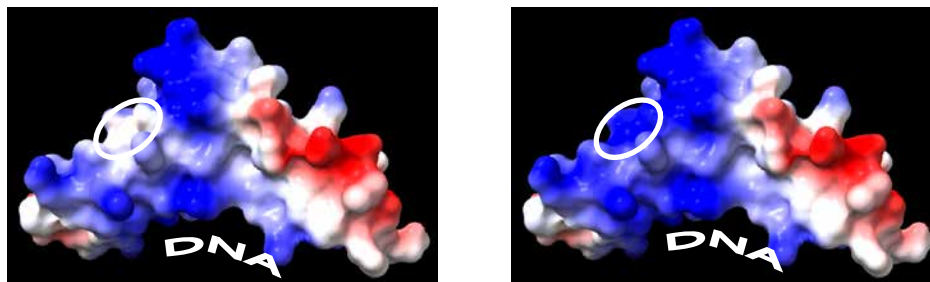

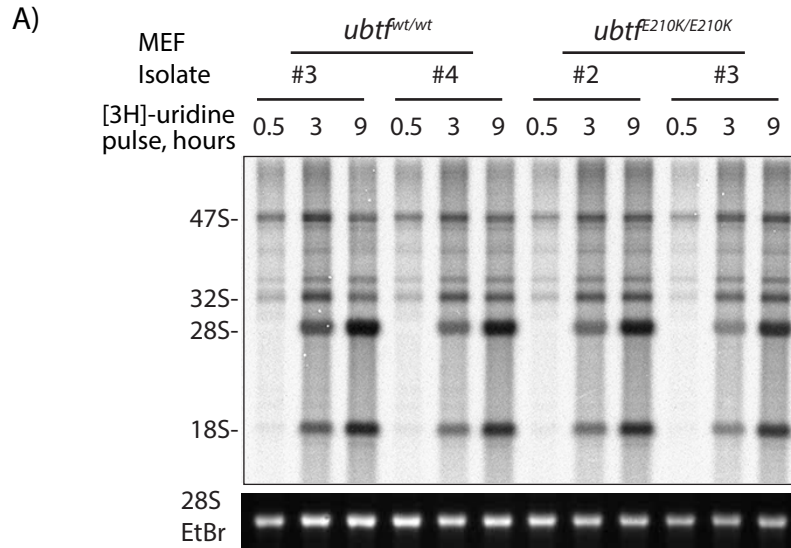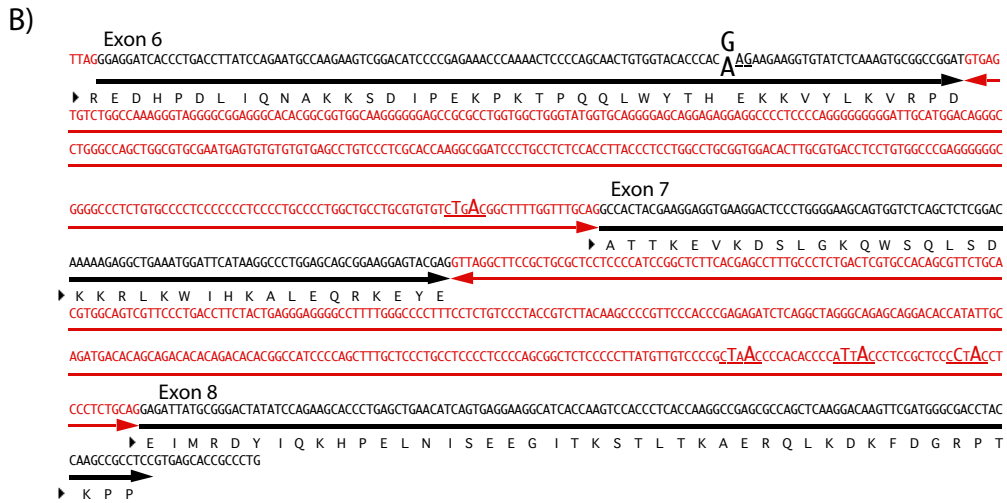



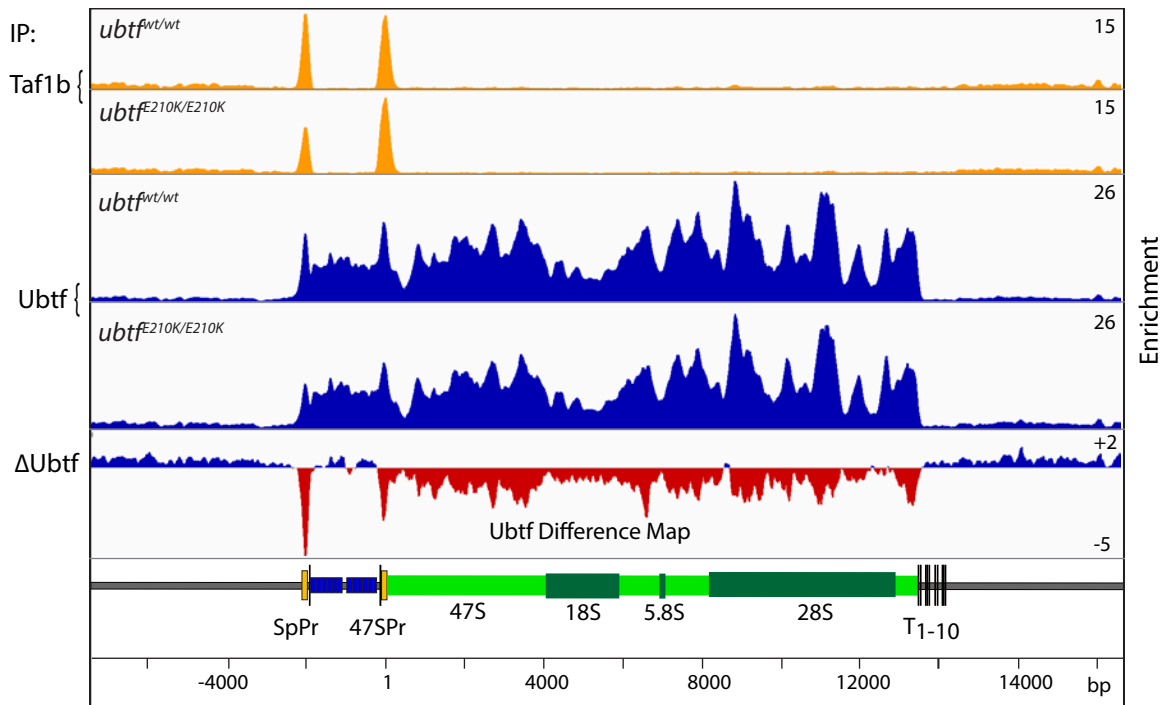

Source: http://biorxiv.org/content/10.1101/2021.06.07.447350v1.full.pdf
